# Supplementary material for: Acoustic divergence in advertisement calls among three sympatric Microhyla species from East China
Source: PeerJ. 2020 Mar 11;8:e8708. doi: 10.7717/peerj.8708 (PMC7071819; doi:10.7717/peerj.8708)
Supplement: Supplemental Information 4 [file peerj-08-8708-s004.xls]

## Sheet: all calls
Raw data of all advertisement calls in the three Microhyla species
SPECIES	MARK（individual）	Number	CI	CD	PULSE	PR	F0	F1	F2	F3	CTI	DF
MB	001	1	0.379946	0.162	3	18.5185	1543.46	1899.65	2921.44	3772.58	75.8326	2331.78
MB	001	2	0.335952	0.143979	3	20.8364	1441.12	1865.06	2749.77	3831.95	74.3973	2331.78
MB	001	3	0.297957	0.179974	3	16.6691	1470.75	1909.98	2892.25	3783.43	74.289	2331.78
MB	001	4	0.567919	0.161977	3	18.5211	1417.62	1901.54	2788.86	3789.05	73.5631	2331.78
MB	001	5	0.384293	0.109984	2	18.1845	1410.52	1838.64	2916.61	3618.31	75.8554	2331.78
MB	001	6	0.10472	0.1835	3	16.3488	1508.97	1836.8	2981.93	3814.21	73.7306	2331.78
MB	001	7	0.054	0.132581	3	22.6277	1415.31	1836.8	2863.14	3780.66	74.0362	2331.78
MB	001	8	0.314555	0.218752	4	18.2855	1551.99	1984.57	2878.53	3828.95	74.8899	2331.78
MB	001	9	0.835089	0.202784	3	14.7941	1609.13	2143.85	2622.37	3859.88	75.0382	2331.78
MB	001	10	0.231526	0.209171	3	14.3423	1604.37	2037.37	2654	3800.01	76.0669	2331.78
MB	001	11	0.199591	0.338506	6	17.7249	1510.96	1982.82	2611.48	3795.93	73.8875	2331.78
MB	001	12	0.292201	0.274637	5	18.2058	1557.51	2042.85	2729.34	3842	74.6454	2331.78
MB	001	13	0.316152	0.234719	5	21.3021	1563.95	2086.42	2507.88	3813.95	74.781	2331.78
MB	001	14	0.252283	0.255477	5	19.5712	1558.91	2070.41	2524.1	3853.08	74.5605	2331.78
MB	001	15	0.223542	0.284218	6	21.1106	1556.97	2095.76	2562.17	3866.8	74.6208	2331.78
MB	001	16	0.284218	0.271444	6	22.104	1594.08	2110.1	2602.31	3894.85	74.4998	2331.78
MB	001	17	0.241106	0.276234	5	18.1006	1602.58	2110.1	2568.8	3880.96	73.7639	2331.78
MB	001	18	0.234719	0.285814	6	20.9927	1625.62	2120.41	2665.46	3915.08	74.3492	2331.78
MB	001	19	0.223542	0.247493	5	20.2026	1626.11	2040.11	2625.73	3880.48	74.4224	2331.78
MB	001	20	0.271444	0.228332	4	17.5184	1614	2160.75	2564.36	3878.54	74.9894	2373.33
MB	001	21	0.215558	0.281024	6	21.3505	1620.4	2163.95	2583.92	3864.49	74.3347	2373.33
MB	001	22	0.158076	0.295395	4	13.5412	1612.59	2244.82	2585.8	3785.19	73.5615	2331.78
MB	001	23	0.145302	0.271444	6	22.104	1710.19	2156.48	2674.79	3908.38	72.6019	2331.78
MB	001	24	0.292201	0.304975	6	19.6737	1572.85	2167.78	2557.75	3856.43	74.46	2331.78
MB	001	25	0.281024	0.281024	5	17.7921	1587.39	2159.93	2591.78	3818.89	74.6313	2331.78
MB	001	26	0.319346	0.273041	5	18.3123	1564.76	2211.53	2567.53	3656.86	74.2765	2331.78
MB	001	27	0.25867	0.284218	6	21.1106	1527.92	2076.13	2513.07	3797.67	73.6505	2331.78
MB	001	28	0.257073	0.25388	5	19.6943	1554.31	2171.69	2574.77	3704.92	74.6619	2331.78
MB	001	29	0.113368	0.197994	3	15.152	1618.08	2073.94	2665.27	3872.09	71.8662	2040.93
MB	001	30	0.303378	0.223542	5	22.3672	1568.45	2185.42	2535.02	3782.19	75.0307	2331.78
MB	001	31	0.266654	0.223542	5	22.3672	1747.42	2237.79	2798	3854.03	72.5883	2331.78
MB	001	32	0.191607	0.290605	5	17.2055	1557.69	2144.31	2545.06	3836.53	74.6334	2331.78
MB	001	33	0.295395	0.207575	4	19.2701	1714.67	2201.38	2635.56	3850.19	73.6549	2290.23
MB	001	34	0.274637	0.317749	6	18.8828	1628.63	2160.47	2612.47	3780.36	74.3517	2331.78
MB	001	35		0.252283	6	23.7828	1800.63	2160.47	2882.01	3777.02	73.9202	2331.78
MB	002	1	0.227855	0.255198	5	19.5926	1364.11	1964.49	2853.46	3768.88	75.4962	2040.93
MB	002	2	0.220564	0.226032	4	17.6966	1561.6	2040.27	2833.59	3663.35	74.4003	2040.93
MB	002	3	0.222387	0.244261	4	16.3759	1668.88	2084.22	2843.28	3757.03	73.9137	2040.93
MB	002	4	0.215095	0.262489	4	15.2387	1671.66	2161.39	2825.09	3830.54	73.4143	2040.93
MB	002	5	0.213272	0.2953	4	13.5455	1699.33	2181.25	2721.78	3840.15	72.5483	2040.93
MB	002	6	0.231501	0.260666	5	19.1816	1699.72	2181.25	2669.18	3825.87	72.6774	2040.93
MB	002	7	0.257021	0.258843	5	19.3167	1730.02	2193.09	2644.97	3835.35	72.3455	2040.93
MB	002	8	0.251552	0.288009	6	20.8327	1754.03	2225.17	2645.26	3828.76	72.3577	2456.43
MB	002	9	0.271603	0.240615	6	24.9361	1794.93	2263.62	2650.31	3878.88	73.2745	2456.43
MB	002	10	0.257021	0.244261	5	20.4699	1785.29	2266.87	2642.75	3879.43	73.4467	2414.88
MB	002	11	0.233324	0.271603	6	22.0911	1814.55	2312.02	2681.52	3879.84	73.5187	2414.88
MB	002	12	0.26978	0.235146	6	25.5161	1800.97	2341.53	2672.48	3927.15	74.2571	2456.43
MB	002	13	0.28254	0.231501	6	25.9178	1840.82	2386.82	2708.21	4009.12	75.0462	2456.43
MB	002	14	0.26778	0.247906	5	20.1689	1811.43	2365.78	2727.62	3995.43	74.4994	2456.43
MB	002	15	0.284363	0.271603	6	22.0911	1800.12	2368.56	2728.98	3977.56	74.2779	2456.43
MB	002	16	0.277072	0.257021	5	19.4537	1820.53	2374.86	2740.01	3995.75	74.4848	2456.43
MB	002	17	0.300769	0.229678	6	26.1235	1825.96	2365.9	2720.97	4025.33	74.7987	2414.88
MB	002	18	0.324466	0.257021	6	23.3444	1810.23	2369.34	2750.36	4023.98	74.1427	2414.88
MB	002	19	0.280718	0.242438	6	24.7486	1796.31	2356	2765.5	4017.15	74.6203	2456.43
MB	002	20	0.30806	0.253375	5	19.7336	1786.85	2352.02	2764.69	4018.14	73.9113	2456.43
MB	002	21	0.26978	0.229678	6	26.1235	1806.19	2341.84	2728.36	4021.56	74.5593	2456.43
MB	002	22	0.309883	0.238792	6	25.1265	1813.21	2355.76	2798.09	4025.38	74.2794	2414.88
MB	002	23	0.326289	0.2678	7	26.1389	1826.41	2344.54	2779.12	4043.42	73.9591	2456.43
MB	002	24	0.278895	0.266135	6	22.5449	1762.69	2334.37	2759.13	3998.86	73.7467	2456.43
MB	002	25	0.244261	0.258843	6	23.1801	1791.03	2337.89	2769.94	4016.01	73.7568	2456.43
MB	002	26	0.278895	0.28254	7	24.7753	1790.87	2358.26	2833.01	4055.9	73.2198	2040.93
MB	002	27	0.353631	0.288009	7	24.3048	1764.15	2330.44	2796.26	4038.57	73.4949	2456.43
MB	002	28	0.17317	0.297124	7	23.5592	1788.92	2369.75	2830.91	4069.3	74.039	2456.43
MB	002	30		0.204158	4	19.5927	1589.16	2135.48	2586.29	3912.64	70.2974	2331.78
MB	003	1	0.535921	0.214743	3	13.9702	1514.46	2012.82	2463.01	3815.4	74.9027	2331.78
MB	003	2	0.423392	0.216619	4	18.4656	1511.25	2029.64	2483.39	3835.62	76.2931	2331.78
MB	003	3	0.185673	0.28062	5	17.8177	1580.91	2201.95	2671.76	3821.68	76.3467	2456.43
MB	003	4	0.253191	0.217322	5	23.0073	1803.18	2367.48	2793.94	4032.47	74.0712	2456.43
MB	003	5	0.240531	0.261631	7	26.7552	1694.07	2307.38	2751.37	3997.46	74.6364	2456.43
MB	003	6	0.192003	0.261631	5	19.1109	1692.61	2295.26	2703.76	3982.14	74.8451	2456.43
MB	003	7	0.101276	0.28062	5	17.8177	1597.31	2248.46	2631.39	3756.48	73.8627	2331.78
MB	003	8	0.180399	0.285895	6	20.9867	1792.67	2351.21	2768.89	4036.69	73.6781	2456.43
MB	003	9	0.141365	0.258466	5	19.3449	1633.9	2302.09	2637.73	3718.66	74.3512	2331.78
MB	003	10	0.155079	0.309104	6	19.4109	1765.48	2349	2826.15	4045.19	72.8668	2456.43
MB	003	11	0.120266	0.320709	5	15.5905	1624.1	2271.81	2655.34	3827.48	74.0161	2497.98
MB	003	12	0.221542	0.295389	6	20.3122	1794.61	2337.95	2765.92	4029.53	73.2172	2456.43
MB	003	13	0.229982	0.262686	5	19.0341	1618.88	2283.48	2609.31	3769.77	74.3488	2497.98
MB	003	14	0.13609	0.243696	6	24.6208	1727.73	2323.98	2706.75	3993.54	75.7298	2497.98
MB	003	15	0.155079	0.24696	5	20.2462	1646.21	2331.14	2666.58	3763.13	74.4293	2331.78
MB	003	16	0.159299	0.288005	6	20.833	1702.69	2326.48	2740.53	4001.21	74.8375	2331.78
MB	003	17	0.173014	0.235257	5	21.2534	1643.7	2354.87	2679.98	3912.42	74.7743	2497.98
MB	003	18	0.159616	0.237207	5	21.0786	1679.6	2268.3	2664.72	3966.2	75.8446	2373.33
MB	003	19		0.336967	6	17.8059	1672.62	2287.9	2693.5	3970.46	75.5283	2456.43
MB	003	20	0.374709	0.253674	4	15.7683	1750.75	2244.05	2773.18	3916.14	75.0706	2040.93
MB	003	21	0.193986	0.329943	7	21.2158	1688.97	2246.42	2752.84	3958.19	74.5251	2456.43
MB	003	22	0.232112	0.305072	6	19.6675	1784.75	2244.05	2710.27	4057.34	75.6196	2414.88
MB	013	1	0.183985	0.255258	4	15.6704	1446.52	1999.21	2511.53	3727.06	74.3184	2082.48
MB	013	2	0.261888	0.198902	3	15.0828	1596.79	2099.26	2519.26	3766.36	75.2499	2082.48
MB	013	3	0.258573	0.222107	3	13.507	1588.11	2091.92	2551.7	3846.84	74.6354	2082.48
MB	013	4	0.232053	0.24697	4	16.1963	1548.59	2071.03	2518.31	3781.34	74.7714	2082.48
MB	013	5	0.258573	0.256915	4	15.5694	1495.4	2037.12	2474.99	3735.2	74.9781	2082.48
MB	013	6	0.250285	0.248628	4	16.0883	1544.06	2108.11	2493.08	3815.97	75.7829	2082.48
MB	013	7	0.241998	0.265203	4	15.0828	1524.72	2117.01	2499.93	3810.59	75.3853	2082.48
MB	013	8	0.210505	0.237025	4	16.8759	1535.74	2121.73	2529.79	3781.79	75.5668	2082.48
MB	013	9	0.238683	0.212162	4	18.8535	1576.77	2122.05	2527.22	3803.55	76.1365	2082.48
MB	013	10	0.265203	0.225422	4	17.7445	1608.59	2146.11	2577.14	3791.25	75.7479	2082.48
MB	013	11	0.223765	0.222107	4	18.0093	1587.37	2147.74	2577.14	3810.7	75.6605	2331.78
MB	013	12	0.24697	0.223765	4	17.8759	1603.35	2180.8	2580.7	3823.25	75.7612	2082.48
MB	013	13	0.358024	0.258573	5	19.3369	1634.49	2201	2624.34	3828.11	75.913	2331.78
MB	013	14	0.208847	0.261888	4	15.2737	1628.08	2191.59	2670.01	3847.84	75.0777	2082.48
MB	013	15	0.185642	0.245313	5	20.3821	1599.53	2197.71	2653.84	3828.52	75.3499	2082.48
MB	013	16	0.19393	0.256915	4	15.5694	1625	2179.04	2607.51	3845.13	75.1452	2373.33
MB	013	17	0.22708	0.248628	5	20.1104	1666.77	2198.11	2649.51	2649.51	75.6191	2331.78
MB	013	18	0.215477	0.278463	5	17.9557	1673.25	2206.21	2691.4	3833.9	75.2499	2331.78
MB	013	19	0.263545	0.256915	4	15.5694	1599.54	2190.16	2569.28	3784.93	75.3252	2331.78
MB	013	20	0.225422	0.286751	6	20.9241	1706.76	2231.62	2748.75	3881.73	75.3202	2331.78
MB	013	21	0.197245	0.26023	5	19.2138	1693.41	2234.86	2699.31	3896.61	75.5302	2331.78
MB	013	22	0.270175	0.258573	5	19.3369	1693.06	2252.78	2737.85	3919.16	75.3692	2331.78
MB	013	23	0.323216	0.286751	6	20.9241	1694.35	2260.1	2751.49	3891.4	75.258	2331.78
MB	013	24	0.22708	0.26023	5	19.2138	1669.39	2250.04	2686.74	3876.45	75.3564	2331.78
MB	013	25	0.261888	0.256915	6	23.354	1676.3	2273.67	2773.5	3890.08	75.0988	2331.78
MB	013	26	0.281778	0.256915	5	19.4617	1673.57	2268.12	2777.62	3959.92	74.8158	2331.78
MB	013	27	0.71439	0.298353	6	20.1104	1660.12	2225.46	2746.5	3972.92	74.4967	2331.78
MB	013	28		0.270175	6	22.2078	1530.54	2009.1	2573.22	3656.86	75.8709	2331.78
MB	017	1	0.27627	0.24948	4	16.0333	1641.84	2253.91	2573.74	3765.82	74.6529	2331.78
MB	017	2	0.272921	0.219342	5	22.7955	1643.3	2254.82	2556.81	3774.05	75.5092	2331.78
MB	017	3	0.256178	0.224365	4	17.8281	1668.41	2294.59	2694.76	3852.17	75.7101	2331.78
MB	017	4	0.269573	0.262875	5	19.0204	1688.5	2272.29	2681.33	3898.84	76.1114	2331.78
MB	017	5	0.236085	0.261201	4	15.3139	1683.17	2317.97	2763.48	3827.65	75.7712	2290.93
MB	017	6	0.247806	0.267898	6	22.3966	1694.47	2354.02	2753.01	3786.26	77.3563	2331.78
MB	017	7	0.328176	0.24948	5	20.0417	1669.25	2341.08	2707.74	3856.61	77.7656	2331.78
MB	017	8	0.267898	0.23776	5	21.0296	1729.5	2323.66	2701.27	3884.34	77.7189	2331.78
MB	017	9	0.510681	0.267898	5	18.6638	1664.61	2337.9	2730.48	3823.84	77.3959	2331.78
MB	017	10	0.378406	0.219342	5	22.7955	1661.66	2336.62	2698.82	3833.99	76.9914	2331.78
MB	017	11	0.418591	0.239434	5	20.8826	1666.31	2348.91	2764.14	2764.14	76.4833	2331.78
MB	017	12		0.282968	6	21.2038	1701.43	2323.29	2759.63	3965.75	76.5689	2331.78
MB	017	13	0.349942	0.324828	7	21.5499	1683.9	2265.58	2797.94	3917.6	76.5325	2331.78
MB	017	14	0.385104	0.293014	6	20.4768	1696.27	2355.93	2797.15	3938.42	76.4794	2331.78
MB	017	15	0.378406	0.298037	6	20.1317	1682.65	2365.91	2810.32	3954.76	76.3351	2331.78
MB	017	16	0.42194	0.192552	5	25.967	1636.94	2313.85	2650.89	3866.44	76.7135	2331.78
MB	017	17	0.47552	0.27627	6	21.7179	1659.53	2356.64	2772.41	4038.02	75.7313	2331.78
MB	017	18	0.308083	0.247806	5	20.1771	1635.09	2370.19	2772.79	4019.92	75.6282	2331.78
MB	017	19	0.44873	0.318129	6	18.8603	1691.05	2336.63	2833.85	4003.75	75.4153	2331.78
MB	017	21	0.629561	0.246132	6	24.3772	1599.21	2332.13	2698.69	3961.43	75.5595	2331.78
MB	017	22	0.480543	0.301386	6	19.908	1657.66	2337.51	2751.62	4015.98	75.2213	2331.78
MB	017	23	0.515704	0.215993	5	23.1489	1592.6	2331.11	2664.8	3901.77	75.3931	2331.78
MB	017	24		0.286316	7	24.4485	1664.64	2347.86	2804.83	3993.49	75.2457	2331.78
MB	017	25	0.455427	0.271247	6	22.1201	1641.09	2367.04	2780.58	2780.58	75.5138	2331.78
MB	017	26		0.27627	5	18.0982	1614.32	2328.32	2681.37	3882.89	75.6285	2331.78
MB	022	1		0.286861	4	13.944	1441.56	1808.33	2699.51	3752.65	71.3829	1750.08
MB	022	2	0.48101	0.274863	5	18.1909	1533.27	1821.35	2627.7	3853.19	73.3899	1750.08
MB	022	3		0.307585	5	16.2557	1578.54	1859.09	2579.82	3897.58	73.7451	1750.08
MB	022	4	0.48919	0.265046	4	15.0917	1484.63	1822.75	2606.38	3765.3	73.0047	1750.08
MB	022	5	0.261774	0.269955	5	18.5216	1529.26	1828.57	2595.74	3840.48	73.9648	1750.08
MB	022	6	0.230688	0.260138	4	15.3765	1549.93	1838.91	2578.17	3903.74	74.382	1750.08
MB	022	7	0.196331	0.281407	4	14.2143	1589.03	1832.33	2568.44	3906.37	74.0608	1750.08
MB	022	8	0.171789	0.260138	4	15.3765	1600.12	1841.47	2596.34	3927.81	73.8847	1750.08
MB	022	9	0.251958	0.18815	4	21.2596	1633.21	1869.51	2536.09	3959.83	75.0602	1708.53
MB	022	10	0.161973	0.250322	5	19.9743	1637.51	1853.51	2556.11	3960.82	74.1163	1750.08
MB	022	11	0.340306	0.245413	5	20.3738	1616.97	1864.27	2536.26	3986.25	73.9556	1750.08
MB	022	12	0.204511	0.286315	6	20.9559	1651.76	1865.02	2538.15	3980.17	74.0023	1750.08
MB	022	13	0.124343	0.274863	4	14.5527	1624.78	1836.01	2530.47	3942.28	73.4648	1750.08
MB	022	14	0.543181	0.25523	5	19.5902	1653.7	1846.97	2542.79	3993.07	74.2944	1750.08
MB	022	15	0.17997	0.281407	6	21.3214	1621.84	1860.53	2659.76	3862.77	74.1778	1791.63
MB	022	16	0.287952	0.250322	6	23.9691	1642.14	1851.58	2535.01	3838.81	74.2569	1750.08
MB	022	17	0.499007	0.322309	7	21.7183	1641.36	1866.3	2553.37	3921.62	73.7733	1750.08
MB	022	18	0.157064	0.260138	5	19.2206	1633.41	1897.57	2566.68	3972.92	74.0583	1750.08
MB	022	19		0.269955	7	25.9302	1674.66	1864.6	2545.25	3859.55	73.9322	1750.08
MB	025	1	0.271	0.201867	3	14.8613	1659.14	2012.23	2698.82	2698.82	75.869	2040.93
MB	025	2	0.247495	0.262704	4	15.2263	1713.24	2025.79	2673.74	3831.04	74.7457	2040.93
MB	025	3	0.129969	0.287592	4	13.9086	1749.79	2020.21	2684.02	3835.83	74.0881	2040.93
MB	025	4	0.16177	0.288974	5	17.3026	1772.88	2188.86	2613.62	3939.65	74.5313	2124.03
MB	025	5	0.178362	0.279296	5	17.9022	1697.44	2159.79	2589.75	3931.47	73.798	2124.03
MB	025	6	0.190806	0.253025	5	19.7609	1718.84	2134.81	2579.56	3892.36	74.2073	2040.93
MB	025	7	0.423092	0.271	5	18.4502	1647.31	2101.76	2566.82	3885.24	74.0512	2040.93
MB	025	8	0.633255	0.294505	6	20.3732	1709.86	2104.81	2559.95	3971.18	75.0657	2040.93
MB	025	9	0.517112	0.257173	5	19.4422	1717.9	2093.2	2548.02	3910.54	75.0901	2040.93
MB	025	10	0.645698	0.337367	6	17.7848	1682.95	2107.72	2545.4	3979.17	74.7956	2040.93
MB	025	11	0.258556	0.309714	6	19.3727	1669.1	2100.97	2526.11	3939.37	75.2486	2040.93
MB	025	12	0.540617	0.221224	4	18.0812	1650.04	2113.31	2522.17	3941.49	74.6751	2124.03
MB	025	13		0.347046	7	20.1702	1625.05	2085.5	2567.95	3878.62	74.7861	2124.03
MB	025	14	0.537852	0.266852	5	18.737	1686.3	2123.91	2725.73	3717.42	72.7632	2040.93
MB	025	15		0.351194	6	17.0846	1722.34	2139.33	2637.38	3950.79	75.6297	2040.93
MB	025	16	0.573801	0.253025	4	15.8087	1660.69	2108.63	2526.13	3909.73	76.2344	2124.03
MB	025	17	0.230903	0.331826	6	18.0818	1666.82	2109.22	2506.36	3953.16	75.3304	2124.03
MB	025	18	0.651229	0.273765	5	18.2638	1631.25	2070.83	2510.21	3906.18	75.0862	2124.03
MB	025	19		0.269617	6	22.2538	1762.13	2164.95	2584.44	4011.95	76.4463	2040.93
MB	019	1	0.17695	0.264582	6	22.6773	1518.16	2127.09	2759.99	3827.91	74.4079	2165.58
MB	019	2	0.183691	0.165996	4	24.097	1490.02	2138.1	2710.83	3803.42	74.0341	2124.03
MB	019	3	0.195487	0.175265	4	22.8226	1495.26	2148.29	2650.73	3764.86	74.7554	2124.03
MB	019	4	0.143245	0.21234	5	23.5471	1515.44	2143.54	2705.31	3766.13	73.8632	2165.58
MB	019	5	0.140717	0.230877	5	21.6566	1507.32	2172.78	2626.57	3774.57	74.3983	2124.03
MB	019	6	0.184533	0.230035	5	21.7358	1567.01	2175.72	2630.63	3781.11	74.677	2165.58
MB	019	7	0.173579	0.192117	5	26.0258	1606.65	2179.44	2623.56	3804.79	74.837	2124.03
MB	019	8	0.307556	0.281434	5	17.7662	1585.6	2156.84	2661.11	3799.02	74.2807	2124.03
MB	019	9	0.244359	0.236776	5	21.117	1545.18	2185.13	2659.69	3788.86	74.9629	2124.03
MB	019	10	0.07078	0.283962	6	21.1296	1632.81	2207.77	2584.85	3835.34	75.3171	2331.78
MB	019	11	0.099429	0.205599	3	14.5915	1511.13	2129.44	2627.43	3771.28	73.2834	2124.03
MB	019	12	0.21234	0.148301	3	20.2291	1476.32	2160.01	2540.68	3775.27	74.1833	2165.58
MB	019	13	0.259526	0.198858	4	20.1149	1519.6	2155.12	2507.55	3812.42	75.1719	2165.58
MB	019	14	0.132291	0.316824	6	18.938	1626.32	2209.3	2594.32	3872.15	75.8453	2165.58
MB	019	15	0.308398	0.246887	6	24.3026	1630.75	2197.15	2582.75	3828.81	77.0205	2331.78
MB	026	1	0.254418	0.151939	6	39.4895	1641.38	2053.45	2956.16	3877.61	73.3843	2040.93
MB	026	2	0.221113	0.20116	4	19.8847	1697.74	2114.8	2904.84	3752.55	73.0689	2040.93
MB	026	3	0.197984	0.235915	4	16.9553	1700.92	2115.73	2838.01	3750.31	72.703	2040.93
MB	026	4	0.229439	0.225739	4	17.7196	1717.03	2117.79	2839.88	3761.42	73.1972	2165.58
MB	026	5	0.262745	0.187807	5	26.6231	1747.27	2134.27	2875.54	3738.84	73.88	2165.58
MB	026	6	0.219262	0.244242	5	20.4715	1699.34	2124.13	2818.98	3761.75	72.867	2165.58
MB	026	7	0.227589	0.211851	4	18.8812	1714.17	2112.44	2776.43	3752.76	73.2121	2040.93
MB	026	8	0.254418	0.223888	5	22.3326	1706.03	2118.31	2847.07	3771.9	73.4555	2040.93
MB	026	9	0.651311	0.225739	6	26.5794	1740.79	2132.89	2774.72	3776.59	73.9799	2040.93
MB	026	10	0.223888	0.222038	5	22.5187	1706.21	2189.61	2670.4	3826.82	74.4774	2203.07
MB	026	11	0.084189	0.26367	6	22.7557	1712.32	2204.66	2690.47	3867.6	74.1331	2165.58
MB	026	12	0.482932	0.308078	7	22.7215	1753.44	2155.6	2837.31	3927.48	73.1006	1916.28
MB	026	13	0.20261	0.231289	5	21.618	1676.01	2102.97	2868.64	3729.85	73.2101	1916.28
MB	026	14	0.160052	0.250718	5	19.9427	1693.66	2119.86	2884.35	3747.58	73.156	2040.93
MB	026	15	0.278473	0.242391	5	20.6278	1663.63	2137.3	2831.89	3672.58	72.9249	2040.93
MB	026	16	0.516238	0.219262	4	18.243	1643.24	2160.6	2800.51	3633.12	71.8544	2040.93
MB	026	17		0.229439	5	21.7923	1629.95	2068.2	2851.52	3686.96	72.5859	2040.93
MB	028（1）	1	0.489976	0.25482	4	15.6974	1412.85	1849.63	3110.07	3951.53	75.6064	1750.08
MB	028（1）	2	0.393134	0.273234	6	21.9592	1577.63	1938.5	2619.21	3978.06	76.2732	1791.63
MB	028（1）	3	0.394287	0.251329	5	19.8942	1604.3	2007.54	2601.88	3996.15	75.5606	1874.73
MB	028（1）	4	0.154487	0.336643	5	14.8525	1578.55	1987.29	2571.1	3896.4	74.1973	1916.28
MB	028（1）	5	0.225966	0.29168	4	13.7137	1607.53	1967.22	2561.15	3863.89	73.7545	1874.73
MB	028（1）	6	0.138346	0.334337	5	14.955	1615.87	1957.36	2555.27	3808	73.748	1883.18
MB	028（1）	7	0.234036	0.298597	5	16.745	1585.74	1957.7	2511.17	3752.75	74.0738	1874.73
MB	028（1）	8	0.193685	0.333184	5	15.0067	1575.58	1961.38	2505.68	3754.17	73.5136	1874.73
MB	028（1）	9	0.219048	0.285916	4	13.9901	1634.25	1959.89	2493.8	3730.09	73.7525	1791.63
MB	028（1）	10	0.14118	0.340101	4	11.7612	1626.49	1951.7	2495.62	3766.3	73.2523	1916.28
MB	028（1）	11	0.182156	0.376994	5	13.2628	1592.33	1968.17	2472.91	3770.4	72.9977	1916.28
MB	028（1）	12	0.219048	0.228271	5	21.9038	1661.26	1978.82	2481.29	3798.07	74.9411	1833.18
MB	028（1）	13	0.200602	0.336643	5	14.8525	1590.16	1968.85	2475.82	3771.61	73.1738	1874.73
MB	028（1）	14	0.224813	0.243259	5	20.5542	1678.19	1985.28	2487.98	3774.09	74.566	1874.73
MB	028（1）	15	0.207519	0.318196	5	15.7136	1693.9	1980.56	2486.7	3780.96	73.4753	1916.28
MB	028（1）	16	0.206367	0.315891	5	15.8282	1659.22	1977.2	2509.95	3785.24	73.5442	1916.28
MB	028（1）	17	0.138346	0.334337	5	14.955	1671.84	1975.77	2503.95	3805.4	73.1559	1874.73
MB	028（1）	18	0.15564	0.349324	6	17.176	1713.1	1986.57	2518.84	3795.38	73.1722	1916.28
MB	028（1）	19	0.138346	0.366618	5	13.6382	1701.41	1977.17	2527.72	3792.95	73.1767	1874.73
MB	028（1）	20	0.176392	0.370076	5	13.5107	1702.35	1973.65	2531.53	3814.02	73.0844	1874.73
MB	028（1）	21	0.147569	0.344713	4	11.6039	1665.07	1951.42	2485.55	3759.85	73.3584	1833.18
MB	028（1）	22	0.441555	0.334337	5	14.955	1687.41	1992.88	2537.42	3820.32	74.5545	1874.73
MB	028（1）	23	0.240953	0.28361	5	17.6298	1652.46	2011.92	2506.32	3839.54	76.0825	2040.93
MB	028（1）	24	0.393134	0.318196	5	15.7136	1658.55	1951.78	2469.79	3771.33	74.9384	1874.73
MB	028（1）	25	0.251329	0.230577	4	17.3478	1631.64	1899.74	2444.71	3615.89	75.7369	1791.63
MB	028（1）	26		0.326267	4	12.2599	1609.03	1953.07	2522.17	3696.56	73.7097	1874.73
MB	028（1）	27		0.267469	6	22.4325	1652.16	2045.73	2706.86	3937.13	76.6552	1874.73
MB	030（1）	1	0.411868	0.183702	2	10.8872	1433.69	1784.32	2789.73	3333.42	74.9256	2331.78
MB	030（1）	2		0.164981	3	18.1839	1442.89	1863.55	3001.79	3720.88	73.9759	2331.78
MB	030（1）	3	0.661832	0.199724	3	15.0207	1622.64	2175.37	3099.23	3966.82	76.6915	2331.78
MB	030（1）	4	0.325691	0.212483	3	14.1188	1691.51	2327.65	2331.43	3994.58	75.8496	2331.78
MB	030（1）	5	0.640932	0.2299	4	17.3989	1608.9	2327.65	2811.42	3795.36	74.1884	2331.78
MB	030（1）	6	0.566041	0.226416	4	17.6666	1565.47	2265.26	2823.72	3663.92	75.2388	2456.43
MB	030（1）	7	0.350074	0.275183	5	18.1697	1659.22	2089.81	2730.65	3911.05	74.2281	2331.78
MB	030（1）	8	0.353558	0.339624	4	11.7777	1627.62	2064.53	2802.89	3913.91	73.6591	2331.78
MB	030（1）	9	0.210741	0.2717	5	18.4026	1629.32	2177.01	2579.55	3749.08	74.4574	2331.78
MB	030（1）	10		0.256025	4	15.6235	1629.05	2362.43	2615.52	3917.56	73.8044	2331.78
MB	030（1）	11	0.264683	0.25054	4	15.9655	1425.7	2023.36	2532.49	3910.8	77.3189	2040.93
MB	030（1）	12	0.294991	0.200028	4	19.9972	1502.29	2028.69	2437.49	3746.16	75.0567	2040.93
MB	030（1）	13	0.183864	0.309134	5	16.1742	1611.35	2020.27	2467.12	3770.48	74.7114	2040.93
MB	030（1）	14	0.1677	0.28488	4	14.041	1609.87	2034.54	2476.58	3791.41	74.6985	2040.93
MB	030（1）	15	0.139413	0.305093	4	13.1108	1676.85	2031.64	2498.58	3834.49	74.944	2040.93
MB	030（1）	16	0.183864	0.238417	4	16.7773	1670.81	2019.81	2484.95	3777.75	75.1393	2040.93
MB	030（1）	17	0.171741	0.270745	5	18.4676	1686.26	2139.57	2493.35	3809.84	74.4906	2040.93
MB	030（1）	18	0.117188	0.309134	4	12.9394	1642.74	2120.75	2508.35	3853.13	73.7028	2040.93
MB	030（1）	19	0.195987	0.278827	5	17.9323	1625.88	2104.55	2525.55	3827.59	74.1603	2040.93
MB	030（1）	20	0.179823	0.269734	5	18.5368	1636.42	2087.89	2491.49	3852.56	74.8361	2040.93
MB	030（1）	21	0.193413	0.324288	5	15.4184	1642.92	2067.08	2522.19	3853.99	76.2982	2040.93
MB	030（1）	22	0.142444	0.281857	5	17.7395	1656.32	2067.43	2518.45	3876.07	76.142	2040.93
MB	030（1）	23	0.131331	0.261653	4	15.2874	1652.42	2073.41	2486.72	3884.08	76.5492	2040.93
MB	030（1）	24	0.156587	0.317216	5	15.7621	1650.62	2059.16	2528.37	3831.72	76.4884	2040.93
MB	030（1）	25	0.215181	0.316206	5	15.8125	1662.45	2052.66	2520.65	3842.85	76.6701	2040.93
MB	030（1）	26	0.146485	0.315195	5	15.8632	1624.43	2047.87	2509.57	3819.35	76.1866	2040.93
MB	030（1）	27	0.134362	0.353585	6	16.969	1674.72	2048.32	2555.38	3858.61	77.2809	2040.93
MB	030（1）	28	0.147495	0.327318	5	15.2757	1664.01	2043.74	2576.9	3868.86	76.789	2040.93
MB	030（1）	29	0.149516	0.302062	5	16.5529	1633.63	2035.22	2512.7	3820.38	77.0705	2040.93
MB	030（1）	30	0.130321	0.329339	6	18.2183	1662.72	2032.26	2511.09	3801.44	76.9086	2040.93
MB	030（1）	31	0.178813	0.269734	6	22.2441	1689.58	2043.89	2547.45	3830.8	77.472	2040.93
MB	030（1）	32	0.144465	0.329339	6	18.2183	1696.41	2037.44	2552.12	3825.05	76.8815	2040.93
MB	030（1）	33	0.182854	0.330349	5	15.1355	1658.64	2019.82	2557.36	3799.48	76.4116	2040.93
MB	030（1）	34	0.21114	0.235386	4	16.9934	1604.89	2072.86	2461.49	3868.62	75.6336	2040.93
MB	030（1）	35	0.172751	0.277816	6	21.597	1638.23	2133.41	2495.11	3807.86	74.8364	2040.93
MB	030（1）	36	0.198007	0.279837	5	17.8675	1569.28	2093.7	2462.18	3793.01	73.824	2040.93
MB	030（1）	37		0.279837	6	21.4411	1631.23	2138.36	2493.97	3787.5	74.8854	2040.93
MB	030（2）	1	0.257319	0.197519	4	20.2512	1587.85	1974.67	2892.03	3807.13	77.1639	1750.08
MB	030（2）	2	0.25007	0.199331	3	15.0503	1497.92	1931.21	2843.46	3766.81	74.4062	1750.08
MB	030（2）	3	0.228325	0.199331	3	15.0503	1475.25	1917.54	2834.13	3764.01	72.9867	1750.08
MB	030（2）	4	0.572624	0.273627	6	21.9277	1439.11	1967.25	3082.98	3806.49	73.0273	1750.08
MB	030（2）	5		0.271815	4	14.7159	1654.84	2014.09	2786.73	3913.29	76.3418	1750.08
MB	030（2）	7	0.13772	0.282688	6	21.2248	1429.86	2064.57	2912.86	3933.89	73.7209	1750.08
MB	030（2）	8	0.224701	0.184834	2	10.8205	1425.71	1861.95	2996.77	3887.56	68.8651	1750.08
MB	030（2）	9	0.139532	0.193895	2	10.3149	1446.94	1900.91	2865.9	3666.7	70.3994	1750.08
MB	030（2）	10	0.157653	0.175774	2	11.3782	1527.81	1875.39	2687.01	3795.63	73.35	1750.08
MB	030（2）	11	0.109	0.237385	3	12.6377	1551.64	1930.96	2686.8	3844.91	72.7569	1791.63
MB	030（2）	12	0.155841	0.228325	2	8.75944	1509.83	1886.96	2684.64	3913.18	71.0371	1791.63
MB	030（2）	13	0.186647	0.25007	3	11.9966	1629.72	1973.61	2626.18	3883.04	72.6992	1791.63
MB	030（2）	14	0.210204	0.244634	4	16.351	1576.14	1967.81	2667.08	2667.08	72.9502	1791.63
MB	030（2）	15	0.183022	0.260943	4	15.329	1570.4	1962.01	2604.17	3836.59	73.0036	1791.63
MB	030（2）	16	0.17215	0.237385	3	12.6377	1598.56	1949.93	2581.43	3663.91	72.6877	1833.18
MB	030（2）	17	0.148592	0.266379	4	15.0162	1568.72	1940.69	2571.25	3620.85	73.2546	1791.63
MB	030（2）	18	0.045303	0.373293	4	10.7154	1620.64	1931.7	2565.77	3629.81	72.0007	1791.63
MB	030（2）	19	0.078	0.360608	5	13.8655	1673.21	1983.74	2610.42	3715.98	72.3078	1791.63
MB	030（2）	20	0.161277	0.293561	5	17.0322	1627.13	2014.69	2619	3728.29	72.6766	1874.73
MB	030（2）	21	0.173962	0.36242	6	16.5554	1630.95	2021.91	2603.93	3734.87	72.9754	1916.28
MB	030（2）	22	0.186647	0.335239	5	14.9147	1652.99	2067.77	2643.96	3802.55	72.2416	1874.73
MB	030（2）	23	0.139532	0.338863	6	17.7063	1655.1	2055.64	2625.25	3766.37	72.9502	1874.73
MB	030（2）	24	0.262755	0.273627	5	18.2731	1653.71	2092.67	2704.15	3827.68	72.8491	1874.73
MB	030（2）	25	0.199331	0.35336	6	16.9799	1669.54	2066.76	2662.83	3825.69	72.9343	1916.28
MB	030（2）	26	0.098	0.367857	6	16.3107	1655.2	2059.31	2636.29	3790.44	72.5899	1916.28
MB	030（2）	27		0.324366	5	15.4147	1669.33	2056.66	2655.24	3844.5	72.3608	1874.73
MB	030（2）	28	0.175774	0.262755	4	15.2233	1605.31	2013.94	2536.65	3581.04	76.5929	1874.73
MB	030（2）	29	0.152217	0.322554	5	15.5013	1677.72	2048.95	2614.92	3746.79	72.5212	1833.18
MB	030（2）	30	0.173962	0.309869	6	19.363	1661.88	2054.95	2620.75	3733.86	72.9688	1874.73
MB	030（2）	31	0.114	0.35336	7	19.8098	1682.17	2079.48	2637.73	3800.72	72.4477	1916.28
MB	030（2）	32	0.087	0.369669	5	13.5256	1689.35	2056.73	2606.62	3753.29	72.1932	1874.73
MB	030（2）	33	0.070672	0.311682	5	16.042	1724.24	2066.17	2664.5	3779.97	72.6598	1916.28
MB	030（2）	34	0.095135	0.361514	5	13.8307	1718.79	2032.58	2589.68	3685.9	72.4304	1833.18
MB	030（2）	35	0.070672	0.289936	4	13.7961	1738.59	2045.77	2591.15	3725.08	73.0111	1874.73
MB	030（2）	36	0.049	0.339769	5	14.7159	1668.37	2039.47	2611.89	3735.39	72.5095	1874.73
MB	030（2）	37	0.102384	0.356984	5	14.0062	1638.1	2018.6	2667.5	3783.76	72.2377	1874.73
MB	030（2）	38		0.364233	5	13.7275	1674.18	2043.14	2623.16	3769.33	71.9614	1874.73
MB	035（1）	1	0.123034	0.314421	4	12.7218	1580.03	2260.3	2732.11	3771.31	73.6495	2331.78
MB	035（1）	2	0.165754	0.247777	4	16.1435	1578.61	2303.81	2722	3699.35	72.7365	2331.78
MB	035（1）	3	0.182843	0.297333	5	16.8162	1569.37	2275.88	2726.12	3748.81	73.122	2290.23
MB	035（1）	4	0.174298	0.297333	4	13.4529	1592.46	2278.49	2709.68	3708.91	73.4282	2290.23
MB	035（1）	5	0.177716	0.326382	4	12.2556	1586.57	2251.74	2643.38	3761.32	72.8586	2331.78
MB	035（1）	6	0.152084	0.343471	5	14.5573	1581.43	2260.68	2671.39	3746.63	73.9873	2331.78
MB	035（1）	7	0.174298	0.326382	5	15.3195	1589.99	2270.31	2666.63	3733.7	74.3078	2290.23
MB	035（1）	8	0.174298	0.360559	5	13.8674	1612.53	2289.25	2688.45	3753.45	74.6837	2290.23
MB	035（1）	9	0.196513	0.345179	6	17.3823	1580.7	2258.99	2660.57	3780.02	74.4773	2331.78
MB	035（1）	10	0.194804	0.305877	4	13.0772	1585.24	2254.39	2642.68	3795.4	74.5115	2290.23
MB	035（1）	11	0.193095	0.333218	6	18.0062	1595.08	2289.25	2665.93	3765.46	75.6295	2290.23
MB	035（1）	12	0.179425	0.302459	5	16.5312	1613.14	2313.77	2687.49	3743.69	75.7731	2331.78
MB	035（1）	13	0.17259	0.334926	5	14.9287	1593.16	2293.18	2667.11	3771.54	76.25	2331.78
MB	035（1）	14	0.123034	0.336635	5	14.8529	1569.06	2268.1	2647.43	3760.98	74.8589	2539.53
MB	035（1）	16	0.199931	0.374229	6	16.033	1597.94	2287.18	2649.34	3660.1	76.5349	2581.08
MB	035（1）	17	0.227272	0.3298	6	18.1928	1606.82	2302.67	2679.61	3689.43	76.8781	2331.78
MB	035（1）	18	0.164046	0.352015	6	17.0447	1610.58	2295.82	2666.71	3705	76.2199	2331.78
MB	035（1）	19	0.18626	0.355432	6	16.8809	1602.4	2309.66	2669.71	3708.68	76.7802	2622.23
MB	035（1）	20	0.182843	0.345179	6	17.3823	1606.12	2320.37	2678.2	3735.7	77.5198	2539.53
MB	035（1）	21	0.24436	0.326382	6	18.3834	1602.13	2293.97	2661.53	3701.81	77.4106	2539.53
MB	035（1）	22	0.240942	0.3298	6	18.1928	1600.12	2303.26	2668.18	3727.63	77.6639	2539.53
MB	035（1）	23	0.201639	0.338344	6	17.7334	1601.42	2297.35	2675.92	3680.43	77.6806	2581.08
MB	035（1）	26	0.305877	0.345179	6	17.3823	1585.97	2278.24	2668.94	3703.01	76.4656	2581.08
MB	035（1）	27	0.295624	0.307586	6	19.5067	1576.99	2262.84	2663.43	3610.5	77.3681	2581.08
MB	035（1）	28	0.230689	0.362267	6	16.5624	1590.54	2284.07	2672.76	3665.26	76.8543	2539.53
MB	035（1）	29		0.355432	6	16.8809	1578.93	2264.16	2653.51	3687.66	76.6628	2331.78
MB	035（2）	1	0.378155	0.240643	3	12.4666	1517.46	1855.14	2679.04	3701.7	73.3479	1750.08
MB	035（2）	2	0.346999	0.247089	3	12.1414	1557.71	1862.31	2664.4	3730.84	73.9051	1750.08
MB	035（2）	3	0.242792	0.246015	3	12.1944	1550.79	1894.87	2701.4	3948.55	73.319	1791.63
MB	035（2）	4	0.238495	0.246015	3	12.1944	1481.62	1909.37	2672.83	3888.91	72.86	1750.08
MB	035（2）	5	0.236346	0.237421	3	12.6358	1603.32	1899.14	2576.27	3905.81	72.9817	1750.08
MB	035（2）	6	0.221306	0.228826	3	13.1104	1599.18	1906.72	2574.52	3935.84	73.1362	1750.08
MB	035（2）	7	0.236346	0.268575	4	14.8934	1585.33	1894.9	2589.05	3923.1	73.7163	1791.63
MB	035（2）	8	0.20734	0.239569	5	20.8708	1613.25	1896.9	2675.83	3709.36	74.1629	1791.63
MB	035（2）	9	0.309399	0.267501	5	18.6915	1661.75	1948.1	2654.19	3951.64	74.1603	1791.63
MB	035（2）	10	0.305102	0.243866	5	20.5031	1619.04	1934.72	2593.04	3785.2	74.7344	1833.18
MB	035（2）	11	0.288987	0.237421	5	21.0596	1666.11	1943.16	2595.67	3695.75	75.1022	1791.63
MB	035（2）	12	0.255684	0.242792	5	20.5938	1683.13	1960.37	2600.35	3695.19	75.4055	1791.63
MB	035（2）	13	0.237421	0.224529	5	22.2688	1697.56	1969	2589.62	3656.09	75.5896	1791.63
MB	035（2）	14	0.183706	0.236204	6	25.4018	1673.32	1951.32	2593.93	3696.71	74.76	1833.18
MB	035（2）	15	0.174037	0.285764	6	20.9963	1699.07	1969.01	2618.82	3770.33	74.5434	1750.08
MB	035（2）	16	0.167591	0.243866	5	20.5031	1696.95	1971.05	2608.55	3703.29	75.4561	1750.08
MB	035（2）	17	0.090241	0.324439	6	18.4935	1716.94	1972	2637.19	3689.94	74.12	1833.18
MB	035（2）	18	0.041898	0.357742	5	13.9766	1719.98	1955	2603.99	3707.15	73.6162	1791.63
MB	035（2）	19	0.185854	0.242792	4	16.475	1717.02	1955	2642.8	3727.92	75.2865	1791.63
MB	035（2）	20	0.176185	0.32981	5	15.1602	1733.88	1973.67	2712.65	3779.58	73.8971	1833.18
MB	035（2）	21	0.118173	0.337331	5	14.8222	1715.7	1972.44	2627.66	3696.43	74.4179	1791.63
MB	035（2）	22	0.095613	0.334108	6	17.9583	1721.62	1975.96	2630.16	3706.39	74.5523	1791.63
MB	035（2）	23	0.08487	0.306179	5	16.3303	1732.67	1978.22	2653.84	3736.97	74.0311	1791.63
MB	035（2）	24	0.233123	0.280393	5	17.8321	1727.58	1986.29	2633.71	3747.69	74.7275	1791.63
MB	035（2）	25	0.100984	0.333033	6	18.0162	1722.09	1965.93	2616.2	3701.48	74.9398	1833.18
MB	035（2）	26	0.128916	0.353445	5	14.1465	1731.17	1969.19	2648.61	3714.96	73.8389	1791.63
MB	035（2）	28	0.095613	0.317993	5	15.7236	1712.9	1946.27	2593.6	3661.21	74.6086	1791.63
MB	035（2）	30	0.172965	0.203043	5	24.6253	1755.98	1990.26	2640.21	3702.63	76.1115	1833.18
MB	035（2）	31	0.112802	0.320142	6	18.7417	1719.52	1945.26	2604.3	3623.49	74.4903	1791.63
MB	035（2）	32	0.150402	0.26213	6	22.8894	1693.6	1952.36	2592.16	3638.81	75.3389	1791.63
MB	035（2）	33	0.124619	0.353445	6	16.9758	1722.12	1947.63	2602.98	3690.58	74.1278	1791.63
MB	035（2）	34	0.350222	0.268575	5	18.6168	1701.08	1952.9	2569.51	3630.25	74.9097	1791.63
MB	035（2）	35		0.304027	5	16.4459	1717.48	1962.54	2588.9	3677.43	75.1477	1833.18
MB	036（1）	1	0.102833	0.305266	6	19.655	1591.07	2143.39	2688.8	3855.67	75.4307	2165.28
MB	036（1）	2	0.133877	0.237681	4	16.8293	1700.55	2149.52	2691.54	3837.78	77.2084	2082.48
MB	036（1）	3	0.181413	0.237681	6	25.2439	1644.14	2127.79	2628.29	3885.85	76.9643	2082.48
MB	036（1）	5	0.129027	0.274545	6	21.8543	1680.91	2115.89	2629.7	3842.47	76.4863	2165.58
MB	036（1）	6	0.121266	0.251262	6	23.8795	1666.4	2076.91	2603.43	3846.34	76.3213	2165.58
MB	036（1）	7	0.110594	0.276486	6	21.7009	1660.99	2168.24	2648.74	3753.01	73.8634	2165.58
MB	036（1）	10	0.132907	0.271635	6	22.0885	1657.09	2098.29	2614.35	3837.11	76.4584	2165.58
MB	036（1）	11	0.069849	0.170742	3	17.5704	1517.34	2177.32	2794.64	3893.65	71.608	2290.23
MB	036（1）	15	0.07567	0.255143	6	23.5162	1673.93	2081.56	2596.94	3797.94	76.8273	2290.23
MB	036（1）	19	0.0747	0.173652	3	17.2759	1557.51	2248.29	2732.64	3753.72	74.3104	2290.23
MB	036（1）	21	0.221188	0.292978	6	20.4794	1594.57	2137.2	2635.4	3705.08	76.6941	2331.78
MB	036（1）	22	0.1591	0.275515	6	21.7774	1561.39	2275.79	2688.27	3728.29	75.925	2290.23
MB	036（1）	23	0.2338	0.262904	5	19.0183	1570.22	2292.45	2693.7	3669.2	76.0681	2581.08
MB	036（1）	24	0.177533	0.317231	6	18.9137	1583.69	2299.25	2690.24	3577.13	76.2526	2664.18
MB	036（1）	25	0.141638	0.276486	5	18.0841	1570.05	2287.29	2649.03	3616.08	76.0276	2581.08
MB	036（1）	26	0.058	0.19144	4	20.8943	1605.06	2033.93	2539.6	3689.86	74.0011	2581.08
MB	036（1）	27	0.110594	0.31141	6	19.2672	1594.17	2279.23	2660.66	3712.16	77.1036	2539.53
MB	036（1）	30		0.280366	6	21.4006	1659.13	2056.2	2590.28	3596.24	75.8271	2373.33
MB	036（1）	32	0.105744	0.246412	6	24.3495	1816.74	2310.81	2631.86	3788.55	77.1668	2373.33
MB	036（1）	33	0.104773	0.277456	6	21.6251	1591.24	2308.15	2673.05	3666.52	78.2364	2622.63
MB	036（1）	34	0.07955	0.300739	6	19.9509	1788.02	2302.8	2631.08	3780.19	76.577	2373.33
MB	036（2）	1	0.170177	0.292986	6	20.4788	1666.4	2057.39	2581.08	3701.42	74.307	1999.38
MB	036（2）	2	0.203511	0.245617	5	20.3569	1665.48	2052.54	2590.18	3744.49	73.6451	2331.78
MB	036（2）	3	0.160528	0.319302	5	15.6592	1629.31	2030.11	2572.36	3731.27	72.8913	2331.78
MB	036（2）	4	0.173686	0.256143	5	19.5203	1711.66	2082.4	2620.82	3767.69	74.3913	1957.83
MB	036（2）	5	0.149124	0.326319	6	18.3869	1670.33	2063.63	2583.87	3751.21	73.3813	1957.83
MB	036（2）	6	0.189476	0.298249	5	16.7645	1658.53	2043.48	2583.44	3750.34	73.2713	1957.83
MB	036（2）	7	0.13158	0.314039	6	19.1059	1622.09	2031.16	2559.92	3759.2	73.2679	1957.83
MB	036（2）	8	0.170177	0.29474	6	20.3569	1635.4	2034.4	2580.02	3749.9	73.2838	1957.83
MB	036（2）	10	0.109	0.350881	6	17.0998	1657.55	2041.27	2578.11	3770.39	72.822	1957.83
MB	036（2）	11	0.187721	0.292986	5	17.0657	1668.29	2058.34	2594.49	3768.08	73.2213	1957.83
MB	036（2）	12	0.185967	0.300003	5	16.6665	1628.16	2015.05	2563.7	3775.53	73.1258	1957.83
MB	036（2）	13	0.142107	0.38246	6	15.6879	1639.62	2021.77	2566.89	3747.95	72.7331	1957.83
MB	036（2）	14	0.163285	0.319302	5	15.6592	1639.81	2033	2570.35	3744.4	73.2088	1957.83
MB	036（2）	15	0.186612	0.255425	5	19.5752	1578.07	2021.54	2544.7	3705.8	73.2014	1957.83
MB	036（2）	16	0.135294	0.300911	5	16.6162	1596.87	2028.66	2539.36	3721.18	72.5983	1999.38
MB	036（2）	17	0.234431	0.249593	5	20.0326	1649.75	2043.78	2575.7	3718.69	74.0263	1999.38
MB	036（2）	18	0.111967	0.328903	5	15.2021	1615.38	2021.94	2555.53	3717.2	72.8106	1999.38
MB	036（2）	19	0.2251	0.309076	6	19.4127	1647.18	2028.87	2559.93	3731.96	73.2068	1999.38
MB	036（2）	20	0.116632	0.325404	5	15.3655	1572.56	2130.96	2549.62	3893.68	73.4922	1999.38
MB	036（2）	21	0.239096	0.234431	5	21.3282	1610.84	2156.69	2559.75	3852.1	74.7541	2331.78
MB	036（2）	22	0.188944	0.268254	5	18.6391	1606.69	2194.6	2590.79	3858	75.248	2331.78
MB	036（2）	23	0.270587	0.254259	5	19.665	1608.32	2214.84	2593.71	3879.45	75.6907	2331.78
MB	036（2）	24	0.424542	0.239096	5	20.9121	1624.33	1967.63	2580.5	3629.51	73.4259	2331.78
MB	036（2）	25	0.183113	0.306743	5	16.3003	1677.68	1982.57	2627.12	3566.7	74.2502	2331.78
MB	036（2）	26	0.191277	0.334735	6	17.9246	1699.44	2076.51	2656.51	3645.98	74.4044	2040.93
MB	036（2）	27		0.31724	6	18.9131	1710.54	2069.58	2659.15	3663.97	73.8546	2040.93
MB	036（2）-1	1	0.19128	0.253268	3	11.8452	1561.42	2136.93	2497.46	3668.9	75.1361	2331.78
MB	036（2）-1	2	0.182424	0.249726	3	12.0132	1633.07	2168.42	2525.17	3774.89	72.3256	2331.78
MB	036（2）-1	3	0.157628	0.283377	4	14.1155	1662.58	2176.09	2574.71	3782.86	72.5681	2207.13
MB	036（2）-1	4	0.115112	0.332968	5	15.0165	1671.56	2213.37	2598.29	3798.87	73.3905	2207.13
MB	036（2）-1	5	0.11158	0.358649	6	16.7294	1682.5	2268.6	2662.45	3665.63	74.6035	2331.78
MB	036（2）-1	6	0.076	0.318799	5	15.6839	1711.67	2245.48	2648.11	3732.12	74.2393	2331.78
MB	036（2）-1	7	0.0925	0.313486	6	19.1396	1748.8	2251.85	2683.18	3762.96	74.9319	2331.78
MB	036（2）-1	8	0.196593	0.279835	5	17.8677	1748.01	2200.93	2674.13	3818.69	75.4068	2165.58
MB	036（2）-1	9	0.129291	0.327655	6	18.3119	1733.84	2234.38	2666.65	3723.27	75.19	2331.78
MB	036（2）-1	10	0.065531	0.393186	6	15.26	1739.29	2242.75	2685.83	3799.41	74.1769	2207.13
MB	036（2）-1	11	0.181538	0.263009	5	19.0108	1723.49	2169.6	2660.9	3810.35	75.7861	2165.58
MB	036（2）-1	12	0.190394	0.254154	6	23.6077	1735.56	2138.65	2658.22	3794.13	75.5548	2124.03
MB	036（2）-1	13	0.131947	0.395775	6	15.1601	1736.19	2126.98	2648.67	3799.48	74.8868	2165.58
MB	036（2）-1	14	0.14346	0.247069	6	24.2847	1711.86	2122.91	2659.78	3810.66	75.6299	2165.58
MB	036（2）-1	16	0.165598	0.282492	4	14.1597	1635.44	2219.8	2576.39	3878.86	72.7234	2331.78
MB	036（2）-1	17	0.085899	0.341824	6	17.5529	1706.02	1999.96	2649.49	3640.38	73.4824	2331.78
MB	036（2）-1	18	0.061103	0.390529	6	15.3638	1716.07	2028.28	2630.51	3612.18	73.1562	2331.78
MB	036（2）-1	20	0.193051	0.286919	6	20.9118	1700.82	2109.33	2644.43	3737.62	73.8074	2040.93
MB	036（2）-1	21	0.227587	0.33651	6	17.8301	1739.16	2159.87	2686.01	3842.92	73.6046	2331.78
MB	036（2）-1	22	0.163827	0.350679	6	17.1097	1815.76	2258.05	2728.32	3785.23	74.1601	2165.58
MB	036（2）-1	24	0.18	0.166484	3	18.0197	1751.39	2332.37	2723.75	3873.46	72.153	2456.53
MB	036（2）-1	25	0.334739	0.218732	5	22.859	1666.56	2145.15	2639.1	3790.41	75.4322	2165.58
MB	036（2）-1	26	0.25681	0.241756	5	20.682	1711.09	2176.88	2677.78	3798.42	75.3086	2207.13
MB	036（2）-1	28	0.081	0.408812	6	14.6767	1748.96	2233.62	2706.44	3724.87	74.403	2331.78
MB	036（2）-1	29	0.089	0.334739	5	14.937	1684.17	2212.47	2690.99	3794.53	74.9403	2165.58
MB	036（2）-1	30	0.200135	0.355992	6	16.8543	1723.16	2230.18	2711.45	3822.67	75.9728	2373.33
MB	036（2）-1	31	0.297546	0.311715	6	19.2484	1754.15	2223.01	2707.47	3805.71	75.3788	2165.58
MB	036（2）-1	32		0.343595	6	17.4624	1750.08	2209.78	2697.81	3793.71	75.3832	2165.58
MH	170501|-004001	1	1.2523	0.20434	5	24.469	1424.15	2156.01	2766.96	3894.02	78.8531	2846.25
MH	170501|-004001	2	1.75368	0.191071	5	26.1683	1481.39	2011.66	2768.37	3665.09	79.2027	1701.03
MH	170501|-004001	3	1.46124	0.237304	5	21.07	1550.05	2293.79	2934.81	3993.31	79.9483	3056.2
MH	170501|-004001	4	1.12646	0.256318	6	23.4084	1559.72	2318.34	2941.27	3867.78	79.9238	3037.11
MH	170501|-004001	5	0.967182	0.250125	6	23.988	1616.08	2424.18	3024.41	3974.55	80.3335	3056.2
MH	170501|-004001	6	1.05095	0.289393	6	20.7331	1571	2316.02	2980.15	3897.78	79.5547	3037.11
MH	170501|-004001	7	1.14615	0.281777	6	21.2934	1566.24	2355.3	3059.19	3883.61	79.6575	3018.03
MH	170501|-004001	8	1.00418	0.227551	5	21.9731	1580.51	2385.08	3055.68	3877.47	80.5712	3037.11
MH	170501|-004001	9	1.36095	0.287158	6	20.8944	1588.56	2380.63	3052.81	3825.43	79.5738	2998.94
MH	170501|-004001	10	0.997111	0.268014	6	22.3869	1595.9	2412.92	3084.07	3816.05	79.843	3037.11
MH	170501|-004001	11	0.976538	0.269341	7	25.9894	1633.02	2436.34	3073.91	3828.93	79.7879	3018.03
MH	170501|-004001	12	0.886091	0.342128	7	20.4602	1573.66	2374.14	3014.19	3652.71	79.2349	3208.9
MH	170501|-004001	13	1.18277	0.294338	7	23.7822	1631.44	2457.12	3074.6	3839.4	79.7811	3037.11
MH	170501|-004001	14	0.996667	0.295959	6	20.2731	1542.47	2369.07	3040.93	3676.9	79.9297	3227.98
MH	170501|-004001	15	0.875632	0.258934	6	23.1719	1619.25	2440.09	3082.21	3698.63	80.276	3227.98
MH	170501|-004001	16	0.76214	0.278411	7	25.1427	1599.95	2408.57	3068.72	3626.7	79.3488	3037.11
MH	170501|-004001	17	0.952203	0.317559	10	31.4902	1599.9	2416.02	3055.59	3655.68	78.9448	3018.03
MH	170501|-004001	18	0.75051	0.464441	10	21.5313	1636.83	2495	3074.55	3675.64	78.7552	3018.03
MH	170501|-004001	19	0.693296	0.551944	10	18.1178	1640.41	2513.15	3078.33	3747.8	77.7069	3037.11
MH	170501|-004001	20	0.962537	0.551944	10	18.1178	1640.24	2517.86	3079.24	3683.29	77.5858	3037.11
MH	170501|-004001	21	1.30163	0.592331	11	18.5707	1620.08	2521.07	3091.94	3731.32	77.8599	3037.11
MH	170501|-004001	22	1.03321	0.625986	10	15.9748	1638.03	2526.82	3090.92	3769.35	77.8755	3056.2
MH	170501|-004001	23	0.871668	0.609158	10	16.4161	1597.27	2457.08	3066.98	3708.5	77.9885	3037.11
MH	170501|-004001	24	0.952441	0.599062	10	16.6928	1612.78	2481.83	3069.7	3683.72	77.7187	3037.11
MH	170501|-004001	25	0.928882	0.612524	10	16.3259	1641.62	2515.42	3063.04	3683.52	77.7412	3037.11
MH	170501|-004001	26	1.1712	0.649544	11	16.935	1636.73	2516.11	3062.1	3711.56	77.8001	3056.2
MH	170501|-004001	27		0.379207	7	18.4596	1610.56	2397.91	3017	3620.08	79.5018	3037.11
MH	170501|-004002	1	1.51829	0.216766	5	23.0663	1511.09	2369.77	2952.13	3680.33	80.6002	3037.11
MH	170501|-004002	2	1.34115	0.199626	5	25.0468	1567.92	2376.65	2922.17	3896.26	80.934	3037.11
MH	170501|-004002	3	1.23712	0.247424	5	20.2082	1580.47	2395.35	2960.76	3854.55	80.2623	3037.11
MH	170501|-004002	4	1.22869	0.289599	6	20.7183	1591.97	2387.12	2938.66	3752.14	79.8607	3037.11
MH	170501|-004002	5	1.24274	0.233366	5	21.4256	1598.18	2411.28	2983.41	3824.12	80.5256	3018.03
MH	170501|-004002	6	1.48455	0.298034	6	20.1319	1596.83	2426.87	2972.27	3815.88	79.912	3056.2
MH	170501|-004002	7	1.21744	0.253048	5	19.7591	1559.65	2337.26	2923.75	3696.54	80.1757	3037.11
MH	170501|-004002	8	1.58577	0.219308	5	22.799	1580.16	2369.38	2970.1	3765.27	80.5905	3037.11
MH	170501|-004002	9	0.922218	0.244613	5	20.4405	1590.72	2402.4	2966.71	3807.01	80.2829	3018.03
MH	170501|-004002	10	0.877232	0.320527	6	18.7192	1589.89	2433.48	2966.84	3769.44	79.227	3018.03
MH	170501|-004002	11	1.04874	0.267106	5	18.7192	1537.05	2372.62	2951.54	3726.36	79.3677	3037.11
MH	170501|-004002	12	0.998132	0.262411	6	22.8649	1597.74	2427.79	2988.44	3673.19	79.8814	2998.94
MH	170501|-004002	13	0.894101	0.278352	6	21.5554	1593.96	2440.88	2975.43	3679.98	79.7295	3037.11
MH	170501|-004002	14	0.835057	0.278352	6	21.5554	1584.74	2404.8	2986.78	3808.83	79.5385	3037.11
MH	170501|-004002	15	0.888478	0.278352	6	21.5554	1601.13	2440.07	2972.53	3699.99	79.4377	3056.2
MH	170501|-004002	16	0.888478	0.269917	6	22.2291	1549.82	2399.61	2975.29	3682.44	79.6503	3056.2
MH	170501|-004002	17	0.854738	0.303657	6	19.7591	1584.51	2410.23	2970.01	3676.71	79.2232	3037.11
MH	170501|-004002	18	1.04874	0.292411	6	20.5191	1585.63	2434.09	2992.52	3704.62	79.1015	3037.11
MH	170501|-004002	19	0.773201	0.275541	6	21.7753	1591.32	2448.82	2974.93	3807.59	79.9396	3018.3
MH	170501|-004002	20	0.846303	0.283976	6	21.1285	1593.49	2476.82	2981	3751.66	79.0707	3037.11
MH	170501|-004002	21	0.85755	0.314904	6	19.0534	1568.1	2395.05	2962.6	3492.5	78.992	3037.11
MH	170501|-004002	22	0.972827	0.278352	5	17.9629	1584.76	2391.69	2954.85	3727.36	79.2129	3037.11
MH	170501|-004002	23	0.910971	0.258671	6	23.1955	1591.84	2456.51	2994.22	3818.1	79.6795	3037.11
MH	170501|-004002	24	1.14996	0.289599	6	20.7183	1572.34	2365.52	2961.98	3675.08	79.5635	3018.3
MH	170501|-004002	25		0.281164	6	21.3399	1585.58	2449.47	2969.15	3825.74	79.8733	3018.3
MH	170501|-004003	1	1.10918	0.200937	5	24.8834	1563.43	2255	2837.38	3904.52	80.9002	2846.25
MH	170501|-004003	2	0.821386	0.192263	5	26.006	1588.77	2386.55	2874	3925.12	81.0878	2865.33
MH	170501|-004003	3	1.03726	0.227513	6	26.3721	1560.77	2352.96	2862.6	3928.34	80.2369	2865.33
MH	170501|-004003	4	0.870771	0.232728	6	25.7812	1593.52	2366.28	2886.31	3899.05	80.8136	2865.33
MH	170501|-004003	5	1.08794	0.241603	6	24.8341	1586.68	2382.62	2883.26	3822.4	80.0542	2846.25
MH	170501|-004003	6	0.571659	0.232607	6	25.7946	1575.87	2402.61	2885.39	3906.34	80.8338	2846.25
MH	170501|-004003	7	0.996563	0.270965	6	22.1431	1568.64	2373.13	2886.07	3901.3	79.0326	2865.33
MH	170501|-004003	8	1.11788	0.276454	6	21.7034	1570.66	2369.79	2872.92	3826.45	80.0341	2846.25
MH	170501|-004003	9	0.82414	0.277517	7	25.2237	1587.82	2403.36	2907.16	3921.07	80.385	2846.25
MH	170501|-004003	10	0.681177	0.271209	6	22.1232	1568.39	2388.8	2886.07	3754.57	79.442	2846.25
MH	170501|-004003	11	0.818859	0.285926	6	20.9845	1550.83	2362.38	2875.94	3679.64	78.8345	2846.25
MH	170501|-004003	12	0.813225	0.300499	6	19.9668	1535.02	2310.14	2883.93	3665.07	79.1832	2827.16
MH	170501|-004003	13	1.25458	0.206481	6	29.0583	1528.37	2354.72	2890.19	3686.98	79.6605	2846.25
MH	170501|-004003	14	0.477042	0.268571	6	22.3405	1549.65	2342.14	2920.57	3757.59	80.2994	2846.25
MH	170501|-004003	15	0.939058	0.343695	7	20.3669	1577.74	2418.79	2920.57	3781.42	78.1568	3056.2
MH	170501|-004003	16	0.886471	0.533385	9	16.8734	1622.77	2479.92	2981.14	3689.27	78.0672	3037.11
MH	170501|-004003	17	0.616022	0.34933	7	20.0384	1575.68	2402.27	2918.32	3686.18	78.9058	2998.94
MH	170501|-004003	18	0.730587	0.467651	9	19.2451	1586.57	2439.12	2958.7	3669.47	77.625	3037.11
MH	170501|-004003	19	0.832006	0.593485	10	16.8496	1612.26	2471.05	3040.07	3687.96	77.349	3037.11
MH	170501|-004003	20	0.878959	0.533385	10	18.7482	1607.34	2443.16	3005.29	3715.15	77.9002	3037.11
MH	170501|-004003	21	0.73622	0.522116	9	17.2375	1598.47	2416.1	2989.86	3618.98	77.8292	3037.11
MH	170501|-004003	22	0.890227	0.527751	9	17.0535	1626.09	2472.96	3008	3620.31	77.6555	3037.11
MH	170501|-004003	23	0.833884	0.480798	8	16.639	1618.15	2487.75	2992.49	3661.84	78.0588	3018.03
MH	170501|-004003	24	0.910887	0.482676	9	18.646	1615.53	2493.87	2992.49	3666.03	78.0885	3037.11
MH	170501|-004003	25	0.743734	0.368111	7	19.016	1616.56	2470.6	2994.69	3792.71	78.7737	3037.11
MH	170501|-004003	26	0.770028	0.431967	8	18.5199	1604.78	2445.32	2968.97	3633.1	78.1626	3037.11
MH	170501|-004003	27	0.873324	0.416942	8	19.1873	1616.62	2469.81	2979	3777.4	78.3637	3037.11
MH	170501|-004003	28		0.431967	7	16.2049	1601.11	2445.5	2957.23	3699.09	78.2887	3037.11
MH	170501|-004004	1	0.652022	0.177987	5	28.0919	1592.63	2459.06	2922.02	3708.64	81.6743	2846.25
MH	170501|-004004	2	0.845533	0.250209	5	19.9833	1543.38	2273.44	2839.38	3709.42	79.3419	2846.25
MH	170501|-004004	3	1.42237	0.218162	6	27.5025	1537.42	2292.36	2846.29	3866.71	80.4342	2846.25
MH	170501|-004004	4	1.00083	0.271162	6	22.127	1529.15	2229.57	2836.9	3785.54	80.061	2846.25
MH	170501|-004004	5	0.919486	0.283488	6	21.1649	1541.14	2303.88	2850.96	3865.1	80.2213	2846.25
MH	170501|-004004	6	0.769114	0.266232	6	22.5367	1538.92	2318.77	2857.05	3842.42	80.1328	2846.25
MH	170501|-004004	7	0.973565	0.268507	6	22.3458	1552.26	2336.89	2858.31	3783.75	79.7504	2846.25
MH	170501|-004004	8	0.690446	0.306865	6	19.5526	1541.96	2324.74	2846.05	3595.18	79.8128	2846.25
MH	170501|-004004	9	0.851185	0.312345	7	22.4111	1557.73	2339.27	2854.07	3767.01	79.1203	2846.25
MH	170501|-004004	10	0.842052	0.288599	6	20.7901	1534.72	2311.47	2857.57	3655.95	79.5254	2846.25
MH	170501|-004004	11	0.860317	0.365315	6	16.4242	1565.39	2336.09	2845.83	3648.94	79.2196	2846.25
MH	170501|-004004	12	0.789081	0.270333	6	22.1948	1558.55	2331.84	2847.27	3610.48	79.4825	2846.25
MH	170501|-004004	13	0.772642	0.505962	6	11.8586	1592.51	2476.23	2939.38	3777.78	78.4573	2884.42
MH	170501|-004004	14	0.845705	0.573545	6	10.4613	1613.15	2527.39	3005.88	3784.34	77.9184	3037.11
MH	170501|-004004	15	0.860317	0.542493	7	12.9034	1605.03	2486.23	2983.29	3711.46	77.8697	3037.11
MH	170501|-004004	16	0.902329	0.540667	9	16.6461	1612.59	2479.87	2996.66	3755.9	77.7776	3037.11
MH	170501|-004004	17	0.953476	0.546146	7	12.8171	1606.72	2491.43	2991.05	3713.27	77.8971	3018.03
MH	170501|-004004	18	0.81648	0.354356	9	25.3982	1566.98	2390.25	2957.71	3638.74	79.0032	3037.11
MH	170501|-004004	19	0.984525	0.414633	10	24.1177	1588.82	2468.56	2958.7	3701.42	78.2453	3056.2
MH	170501|-004004	20	1.16536	0.445685	10	22.4374	1608.89	2526.04	2974.19	3737.85	78.7344	2846.25
MH	170501|-004004	21	0.829727	0.427419	8	18.717	1590.11	2500.77	2978.34	3742.71	79.0548	3037.11
MH	170501|-004004	22	0.842052	0.314171	8	25.4638	1587.4	2458.16	2947.07	3672.02	79.3841	3037.11
MH	170501|-004004	23	0.820133	0.334263	7	20.9416	1569.01	2416.89	2927.65	3665.39	79.0288	2846.25
MH	170501|-004004	24	1.14892	0.248414	9	36.2298	1580.83	2428.73	2931.1	3728.54	79.7382	2846.25
MH	170501|-004004	25	0.794561	0.301385	7	23.2261	1551.74	2393.43	2920.39	3661.8	80.2131	2846.25
MH	170501|-004004	26	0.794561	0.270333	7	25.894	1570.72	2436.89	2928.95	3639.48	79.5192	2846.25
MH	170501|-004005	1	1.78321	0.160049	4	24.9923	1416.4	2083.82	2858.6	3804.5	77.3908	2750.81
MH	170501|-004005	2	1.30685	0.222217	5	22.5005	1445.66	2133.75	2795.48	3725.18	78.6822	2750.81
MH	170501|-004005	3	1.16664	0.216926	5	23.0493	1492.75	2194.93	2836.35	3880.15	79.4059	2788.98
MH	170501|-004005	4	1.35182	0.198408	4	20.1605	1483.82	2170.15	2828.58	3932.46	79.5566	2769.9
MH	170501|-004005	5	1.04495	0.232799	5	21.4778	1545.45	2225.89	2817.9	3897.18	79.3667	2731.72
MH	170501|-004005	6	1.09521	0.261898	5	19.0914	1522.45	2246.41	2806.25	3930.17	78.7091	2769.9
MH	170501|-004005	7	0.915322	0.235444	5	21.2365	1565.75	2255.67	2840.92	4048.51	79.5638	2750.81
MH	170501|-004005	8	0.907385	0.341262	6	17.5818	1451.85	2205.14	2877.99	3936.21	78.6509	2750.81
MH	170501|-004005	9	0.978812	0.232799	5	21.4778	1581.01	2326.71	2868.25	3954.01	79.8603	2769.9
MH	170501|-004005	10	0.923258	0.267189	6	22.456	1578.47	2330.66	2892.6	4028.57	79.8362	2769.9
MH	170501|-004005	11	0.867704	0.290998	6	20.6187	1528.31	2291.79	2890.94	3901.08	79.2016	2750.81
MH	170501|-004005	12	0.883577	0.343907	7	20.3543	1567.83	2355.5	2952.48	3927.12	78.8608	2769.9
MH	170501|-004005	13	0.716914	0.275126	6	21.8082	1539.29	2290.68	2881.53	3893.63	79.1913	2788.98
MH	170501|-004005	14	0.658714	0.277771	5	18.0004	1512.08	2283.24	2900.12	3910.62	78.7994	2750.81
MH	170501|-004005	15	0.455015	0.261898	5	19.0914	1547.45	2305.43	2909.16	3916.69	78.6932	2750.81
MH	170501|-004005	16	0.690459	0.312162	6	19.2208	1564	2344.12	2925.41	3907.45	78.0344	2769.9
MH	170501|-004005	17	0.777759	0.341262	6	17.5818	1588.77	2396.69	2944.39	3799.7	78.589	2769.9
MH	170501|-004005	18	0.859768	0.296289	6	20.2505	1578.89	2350.35	2940.36	3925.66	78.5408	2788.98
MH	170501|-004005	19	0.589933	0.354489	7	19.7467	1571.44	2371.31	2969.41	3784.54	78.9878	2769.9
MH	170501|-004005	20	0.677232	0.309516	7	22.616	1488.13	2252.42	2960.64	3888.01	78.0257	2827.16
MH	170501|-004005	21	0.912676	0.526442	8	15.1964	1606.48	2500.46	3061.8	3828.31	77.7738	2960.77
MH	170501|-004005	22	0.315843	0.322744	5	15.4922	1584.41	2371.37	2928.48	3703.13	79.0491	2769.9
MH	170501|-004005	23	0.653423	0.581996	9	15.464	1633.57	2531.18	3083.23	3846.7	76.7545	3247.07
MH	170501|-004005	24	0.769823	0.370361	6	16.2004	1577.8	2390.66	2932.75	3634.98	78.1507	2788.98
MH	170501|-004005	25	0.69984	0.428561	8	18.6671	1609.6	2420.94	3006.28	3778.55	78.1958	2979.85
MH	170501|-004005	26	0.476179	0.335971	6	17.8587	1627.37	2410.68	2965.89	3742.43	78.3813	2788.98
MH	170501|-004005	27	0.870349	0.370361	6	16.2004	1574.59	2389.68	2944.8	3535.3	77.6509	2979.85
MH	170501|-004005	28	0.992039	0.362425	7	19.3143	1601.74	2426.07	2956.37	3595.03	78.8417	2960.77
MH	170501|-004005	29	0.719559	0.357134	7	19.6005	1585.57	2408.64	2968.97	3730.29	79.1861	2960.77
MH	170501|-004005	30	0.849186	0.280416	4	14.2645	1612.26	2444.58	2966.63	3746.87	78.7339	2769.9
MH	170501|-004005	31	0.566124	0.312162	6	19.2208	1563.89	2345.68	2918.44	3733.75	78.7366	2769.9
MH	170501|-004005	32	0.880931	0.367716	7	19.0364	1607.91	2414.91	2935.04	3617.84	78.2573	2769.9
MH	170501|-004005	33		0.277771	5	18.0004	1559.59	2360.17	2932.95	3528.39	78.9319	2750.81
MH	170501|-004005	34	0.555542	0.293644	6	20.4329	1597.77	2401.19	2955.31	3702.64	78.4127	2769.9
MH	170501|-004006	2	1.31579	0.186071	4	21.4972	1447.29	2182.81	2774.89	3862.6	79.6413	2731.72
MH	170501|-004006	3	1.16073	0.183856	4	21.7562	1518.32	2221.23	2791.84	3945.33	79.9466	2769.9
MH	170501|-004006	4	1.23161	0.188286	4	21.2443	1537.28	2278.77	2832.71	3869.13	80.0698	2769.9
MH	170501|-004006	5	1.03225	0.192716	4	20.7559	1555.92	2280.85	2828.17	3939.04	80.1252	2750.81
MH	170501|-004006	6	0.894911	0.265815	5	18.8101	1566.92	2310.26	2846.04	3913.19	79.0505	2769.9
MH	170501|-004006	7	0.979086	0.256955	5	19.4587	1599.31	2343.07	2846.92	3863.69	79.0905	2750.81
MH	170501|-004006	8	0.826242	0.296827	6	20.2138	1592.01	2325.21	2845.07	3881.45	79.1462	2769.9
MH	170501|-004006	9	0.759789	0.252525	6	23.76	1622.75	2399.69	2875.31	3905.13	79.273	2769.9
MH	170501|-004006	10	0.7908	0.294612	5	16.9715	1528.98	2306.89	2899.99	3901.87	78.769	2769.9
MH	170501|-004006	11	0.919278	0.283536	6	21.1613	1643.77	2433.48	2924.86	3865.48	79.1327	2788.98
MH	170501|-004006	12	0.69998	0.292397	6	20.52	1623.77	2415.11	2899.38	3763.39	79.2942	2769.9
MH	170501|-004006	13	0.797446	0.316763	6	18.9416	1623.14	2415.76	2882.31	3708.47	78.6158	2769.9
MH	170501|-004006	14	0.673399	0.276891	6	21.6692	1629.81	2405.83	2907.08	3743.48	78.9348	2769.9
MH	170501|-004006	15	0.755358	0.307903	6	19.4867	1634.87	2441.01	2937.03	3804.96	78.9225	2769.9
MH	170501|-004006	16	0.95915	0.347775	7	20.128	1647.77	2435.23	2914.97	3727.73	78.593	2769.9
MH	170501|-004006	17	1.34901	0.305688	6	19.6279	1634.55	2437.31	2919.5	3777.37	79.3177	2769.9
MH	170501|-004006	18	1.04554	0.243664	5	20.5201	1610.25	2357.06	2887.41	3796.84	79.7418	2769.9
MH	170501|-004006	19	0.735422	0.208222	4	19.2103	1584.99	2386.97	2923.11	3898.91	79.9758	2769.9
MH	170501|-004006	20	0.839533	0.237019	5	21.0954	1619.56	2400.56	2900.63	3930.05	79.5366	2769.9
MH	170501|-004006	21	0.901557	0.250309	5	19.9753	1590.25	2305.92	2852.5	3824.26	78.9589	2750.81
MH	170501|-004006	23	0.925923	0.250309	5	19.9753	1592.84	2350.77	2890.44	3867.95	79.3544	2731.72
MH	170501|-004006	24	1.30471	0.272461	5	18.3513	1630.43	2391.54	2918.35	3872	79.4616	2750.81
MH	170501|-004006	25	0.770864	0.327839	6	18.3017	1600.62	2377.38	2896.93	3785.07	78.8875	2788.98
MH	170501|-004006	26		0.296827	6	20.2138	1608.34	2367.61	2874.48	3789.11	79.1142	2769.9
MH	170501|-004008	2	1.52433	0.225311	5	22.1915	1461.3	2187.49	2820.52	3809.64	78.5571	2140.03
MH	170501|-004008	3	1.50208	0.18915	4	21.1472	1465.23	2163.51	2807.96	3808.68	79.4298	2750.81
MH	170501|-004008	4	1.32034	0.175242	4	22.8256	1512.64	2246.84	2850.2	3840.18	79.6982	2140.03
MH	170501|-004008	5	1.46839	0.257272	5	19.4347	1485.05	2246.44	2781.58	3814.27	78.5962	2750.81
MH	170501|-004008	6	1.03151	0.177178	4	22.5762	1506.29	2210.87	2822.97	3787.28	80.0395	2750.81
MH	170501|-004008	7	1.03537	0.249991	5	20.0007	1542.26	2235.47	2811.61	3929.34	79.345	2750.81
MH	170501|-004008	8	0.975691	0.259699	5	19.2531	1512.33	2231.85	2805.72	3937.99	79.0796	2731.72
MH	170501|-004008	9	0.895594	0.262162	5	19.0722	1556.46	2280.29	2844.5	3923.14	79.2518	2750.81
MH	170501|-004008	10	0.936858	0.286397	6	20.9499	1542.08	2280.1	2840.35	3931.75	78.948	2769.9
MH	170501|-004008	11	0.939285	0.262126	5	19.0748	1538.52	2236.48	2836.42	3895.13	79.3147	2750.81
MH	170501|-004008	12	0.934431	0.303387	6	19.7767	1510.82	2240.85	2852.32	3832.01	78.839	2750.81
MH	170501|-004008	13	0.871326	0.291251	6	20.6008	1513.97	2278.29	2866.88	3801.9	78.9964	2731.72
MH	170501|-004008	14	0.999962	0.320376	6	18.728	1546.96	2297.47	2842.48	3848.8	78.8729	2731.72
MH	170501|-004008	15	0.805795	0.254848	5	19.6195	1542.86	2290.14	2866.46	3836.15	79.7021	2750.81
MH	170501|-004008	16	0.912587	0.26698	5	18.728	1559.13	2335.63	2879.16	3740.47	79.5473	2750.81
MH	170501|-004008	17	0.856764	0.296105	6	20.2631	1554.9	2302.98	2857.61	3799.81	79.0334	2731.72
MH	170501|-004008	18	0.752399	0.313095	6	19.1635	1570.28	2340.03	2853.77	3757.43	78.9203	2731.72
MH	170501|-004008	19	0.978118	0.349501	7	20.0286	1586.96	2372.17	2886.3	3714.1	78.7714	2731.72
MH	170501|-004008	20	0.907733	0.240282	5	20.8089	1563.42	2329.75	2850.95	3701.66	79.8511	2731.72
MH	170501|-004008	21	0.965983	0.303387	6	19.7767	1586.35	2370.31	2870.88	3655.88	79.3684	2750.81
MH	170501|-004008	22	0.932004	0.240282	5	20.8089	1559.52	2281.17	2839.33	3716.75	79.9033	2769.9
MH	170501|-004008	23	1.05093	0.233001	5	21.4591	1567.95	2330.56	2861.13	3753.01	79.7684	2750.81
MH	170501|-004008	24	0.995108	0.252418	5	19.8084	1485.05	2254.28	2826.32	3748.68	79.3177	2769.9
MH	170501|-004008	25		0.230574	5	21.685	1514.71	2264.19	2842.7	3831.94	79.5586	2750.81
MH	170501|-004009	1	1.47698	0.169346	4	23.6203	1391.96	2175.25	2750.14	3778.77	78.5538	2769.9
MH	170501|-004009	2	1.29192	0.254892	5	19.6162	1431.79	2174.82	2747.48	3817.24	78.0407	2750.81
MH	170501|-004009	3	1.16797	0.209501	4	19.093	1478.54	2194.02	2793.68	3899.09	78.9123	2750.81
MH	170501|-004009	4	1.18542	0.237434	5	21.0585	1506.88	2237.24	2823.62	3830.29	78.8159	2769.9
MH	170501|-004009	5	1.09115	0.192042	4	20.8288	1525.76	2251.98	2826.57	3885.47	79.6105	2731.72
MH	170501|-004009	6	1.05597	0.183313	4	21.8206	1542.66	2249.83	2800.8	3887.4	79.9299	2750.81
MH	170501|-004009	7	1.01433	0.296792	6	20.2162	1549.92	2259.95	2816.75	3901.93	78.718	2769.9
MH	170501|-004009	8	0.996874	0.256638	5	19.4827	1551.23	2272.36	2820.48	3948.63	79.3722	2750.81
MH	170501|-004009	9	0.902598	0.26013	5	19.2212	1557.64	2307.5	2848.18	3931.04	79.3193	2750.81
MH	170501|-004009	10	0.996874	0.291555	6	20.5793	1556.31	2281.3	2845.71	3922.36	79.2151	2731.72
MH	170501|-004009	11	0.84324	0.326472	7	21.4413	1564.51	2337.04	2879.5	3890.65	78.9247	2731.72
MH	170501|-004009	12	0.792611	0.288063	6	20.8288	1581.05	2340.75	2859.27	3887.1	79.2922	2769.9
MH	170501|-004009	13	0.825781	0.309013	6	19.4167	1591.95	2366.66	2875.78	3912.44	78.8441	2788.98
MH	170501|-004009	14	0.832765	0.321234	6	18.678	1563.55	2346.92	2872.71	3842.08	78.4622	2769.9
MH	170501|-004009	15	0.935769	0.336947	6	17.807	1587.68	2338.52	2875.12	3868.52	78.9419	2788.98
MH	170501|-004009	16	0.757694	0.317743	6	18.8832	1621.23	2376.93	2903.34	3764.88	79.0296	2769.9
MH	170501|-004009	17	0.726269	0.371864	7	18.8241	1622.1	2398.49	2914.6	3786.63	78.3631	2731.72
MH	170501|-004009	18	0.769915	0.366626	7	19.093	1627.57	2458.23	2918.14	3756.31	78.3417	2769.9
MH	170501|-004009	19	0.825781	0.312505	6	19.1997	1635.68	2463.92	2934.37	3791.93	78.9082	2769.9
MH	170501|-004009	20	0.78039	0.363134	7	19.2766	1614.47	2390.95	2890.1	3676.77	78.7112	2788.98
MH	170501|-004009	21	0.869427	0.317743	6	18.8832	1618.79	2395.63	2913.16	3813.87	78.6383	2769.9
MH	170501|-004009	22	0.829273	0.324726	6	18.4771	1627.51	2418.72	2934.71	3758.49	78.9864	2769.9
MH	170501|-004009	23	0.115591	0.268859	5	18.5971	1625.08	2384.2	2897.21	3699.73	79.1325	2769.9
MH	170501|-004009	24	0.693098	0.183313	4	21.8206	1574.69	2342.7	2899.04	3851.24	80.5119	2750.81
MH	170501|-004009	25	0.970686	0.300284	6	19.9811	1594.81	2369.45	2862.54	3737.57	79.0169	2769.9
MH	170501|-004009	26	0.787373	0.295047	6	20.3357	1606.59	2360.86	2869.06	3726.65	79.4794	2750.81
MH	170501|-004009	27	0.757694	0.289809	6	20.7033	1579.69	2330.19	2854.61	3696.79	78.9678	2788.98
MH	170501|-004009	28	0.769915	0.267113	5	18.7187	1616.42	2371.83	2898.76	3679.96	78.7763	2788.98
MH	170501|-004009	29	0.741981	0.312505	6	19.1997	1634.49	2415.66	2908.64	3748.92	78.7495	2769.9
MH	170501|-004009	30	1.15749	0.254892	5	19.6162	1629.34	2405.51	2909.8	3880.52	78.8605	2769.9
MH	170501|-004009	31	0.775152	0.274097	5	18.2417	1579.98	2313.07	2884.36	3840.68	79.0111	2769.9
MH	170501|-004009	32	0.914819	0.265367	5	18.8418	1620.7	2401.31	2901.25	3762.84	79.4686	2769.9
MH	170501|-004009	33	0.797848	0.186805	4	21.4127	1630.19	2430	2915.05	3880.63	80.3592	2769.9
MH	170501|-004009	34	0.806577	0.309013	6	19.4167	1627.49	2405.58	2898.07	3804	78.7093	2750.81
MH	170501|-004009	35	1.10686	0.288063	6	20.8288	1647	2420.18	2884.65	3723.74	79.3198	2769.9
MH	170501|-004009	36	0.984653	0.193788	5	25.8014	1621.58	2389.68	2905.71	3743.06	80.4198	2750.81
MH	170501|-004009	37	0.930532	0.237434	6	25.2702	1591.49	2369.44	2891.08	3745.75	80.0245	2750.81
MH	170501|-004009	38	0.965449	0.282826	5	17.6787	1605.35	2358.41	2895.8	3913.08	79.4662	2769.9
MH	170501|-004009	39	0.865994	0.237434	6	25.2702	1592.15	2385.05	2893.19	3663.82	80.0091	2769.9
MH	170501|-004009	40	1.07893	0.259047	6	23.1618	1629.42	2384.8	2896.44	3768.87	79.1303	2788.98
MH	170501|-004009	41	0.94799	0.21823	4	18.3293	1542.8	2348.84	2901.29	3811.11	79.7678	2769.9
MH	170501|-004009	42	0.841494	0.272351	6	22.0304	1620.72	2389.9	2879.3	3686.21	79.6783	2769.9
MH	170501|-004009	43	1.26748	0.256638	5	19.4827	1617.14	2406.1	2895.56	3771.05	79.479	2788.98
MH	170501|-004009	44		0.249655	4	16.0221	1620	2403.68	2888.07	3670.65	79.5574	2750.81
MH	170501|-004010	1	1.50268	0.231986	4	17.2424	1312.58	1982.14	2671.28	3673.85	74.5302	2769.9
MH	170501|-004010	2	1.26652	0.257065	5	19.4503	1451.05	2137.75	2781.61	3747.41	78.079	2769.9
MH	170501|-004010	3	1.31249	0.225716	4	17.7214	1555.05	2280.87	2908.5	3913.59	78.9388	2769.9
MH	170501|-004010	4	1.15366	0.215266	5	23.2271	1569.1	2256.41	2812.64	3847.6	79.6	2769.9
MH	170501|-004010	5	0.846434	0.225716	5	22.1517	1563.44	2316.43	2833.36	3849.59	79.6817	2769.9
MH	170501|-004010	6	0.940482	0.254975	6	23.5317	1581.88	2316.36	2920.26	3904.94	79.7707	2769.9
MH	170501|-004010	7	0.800455	0.250195	5	19.9844	1573.35	2293.39	2911.22	3855.56	79.6394	2769.9
MH	170501|-004010	8	0.775375	0.290504	6	20.6538	1558.18	2291.51	2922.13	3724	79.3306	2769.9
MH	170501|-004010	9	0.767015	0.303044	6	19.7991	1572.79	2347.93	2937.59	3717.65	78.9835	3037.11
MH	170501|-004010	10	0.871513	0.275875	6	21.749	1565.84	2326.23	2942.52	3764.29	79.3622	3037.11
MH	170501|-004010	11	1.1244	0.305134	7	22.9407	1568.62	2315.85	2938.09	3751.78	79.3274	3037.11
MH	170501|-004010	12	0.652067	0.309314	6	19.3978	1570.33	2342.63	2953.12	3695.1	79.333	3037.11
MH	170501|-004010	13	0.806725	0.330214	6	18.17	1566.76	2308.37	2948.03	3700.64	78.2211	2922.59
MH	170501|-004010	14	0.896593	0.367833	7	19.0304	1584.74	2376.93	2992.21	3662.1	78.4624	3037.11
MH	170501|-004010	15	0.716856	0.273785	6	21.915	1545.24	2298.89	2946.64	3626.36	79.2839	3056.2
MH	170501|-004010	16	0.804635	0.340663	7	20.5482	1564.62	2335.15	2974.81	3662.84	78.468	3037.11
MH	170501|-004010	17	0.754476	0.351113	6	17.0885	1551.94	2341.93	2989.67	3682.3	78.2226	3018.03
MH	170501|-004010	18	0.382463	0.376193	7	18.6075	1570.38	2364.21	2984.27	3696.06	78.0092	3037.11
MH	170501|-004010	19	1.08678	0.363653	7	19.2491	1579.61	2398.28	3019.76	3735.86	76.8937	3037.11
MH	170501|-004010	20	0.664607	0.300954	6	19.9366	1561.77	2368.54	3016.94	3688.19	79.5521	3037.11
MH	170501|-004010	21	0.884053	0.388733	7	18.0072	1569.35	2375.89	2987.27	3651.42	77.7422	3037.11
MH	170501|-004010	22	0.689687	0.296744	6	20.2194	1567.6	2386.19	3009.01	3674.71	79.0311	3037.11
MH	170501|-004010	23	0.706406	0.332304	6	18.0558	1564.55	2365.24	3012.75	3715.63	78.1718	3037.11
MH	170501|-004010	24	0.635348	0.307224	5	16.2748	1544.4	2367.31	3006.93	3700	78.0661	3037.11
MH	170501|-004010	25	0.762835	0.319764	6	18.7638	1561.29	2351.6	3011.92	3703.21	78.0112	3037.11
MH	170501|-004010	26	0.572649	0.305134	6	19.6635	1539.84	2333.05	2974.95	3568.61	78.5231	3037.11
MH	170501|-004010	27	0.771195	0.275875	6	21.749	1546.64	2342.42	2990.2	3535.77	77.9768	3037.11
MH	170501|-004010	28		0.250795	6	23.9239	1553.4	2352.67	2992.47	3565.13	79.3721	3037.11
MH	170501|-004011	1	1.57591	0.20396	4	19.6117	1486.93	2219.84	2847.17	3688.19	78.2442	2750.81
MH	170501|-004011	2	1.40611	0.246733	5	20.2648	1538.74	2293.77	2827.19	3877.65	78.6884	2750.81
MH	170501|-004011	3	1.14611	0.225508	5	22.1722	1554.37	2322.45	2822.35	3866.99	79.5408	2750.81
MH	170501|-004011	4	0.214896	0.214896	5	23.2671	1550.39	2294.39	2824.05	3805.99	79.5238	2769.9
MH	170501|-004011	5	1.0453	0.214896	4	18.6137	1550.39	2294.39	2824.05	3805.99	79.5238	2769.9
MH	170501|-004011	6	1.14877	0.177754	6	33.7545	1567.79	2282.19	2855.04	3803.89	80.2739	2769.9
MH	170501|-004011	7	0.949789	0.294488	6	20.3743	1526.65	2294.65	2840.08	3867.04	78.6594	2750.81
MH	170501|-004011	8	1.61835	0.27263	5	18.3399	1537.24	2291.26	2861.96	3855.02	79.1704	2769.9
MH	170501|-004011	9	0.891422	0.241427	6	24.8522	1523.68	2260.51	2869.22	3784.38	79.3698	2769.9
MH	170501|-004011	10	0.822443	0.273263	7	25.6163	1524.14	2249.52	2856.74	3814.81	79.4311	2769.9
MH	170501|-004011	11	0.769382	0.376732	6	15.9264	1508.39	2324.7	2925.23	3896.16	78.268	2750.81
MH	170501|-004011	12	0.949789	0.230815	6	25.9948	1574.3	2313.25	2855.16	3896.91	79.5557	2769.9
MH	170501|-004011	13	0.888769	0.259998	6	23.0771	1574.88	2327.93	2874	3993.12	79.3003	2769.9
MH	170501|-004011	14	0.984278	0.265304	5	18.8463	1570.39	2346.31	2883.63	4005.28	79.3741	2750.81
MH	170501|-004011	15	0.721627	0.233468	6	25.6995	1578.73	2324.07	2899.74	3915.67	79.6882	2750.81
MH	170501|-004011	16	0.928564	0.323671	6	18.5373	1594.49	2397.36	2931.28	3979.02	78.4041	2769.9
MH	170501|-004011	17	0.864891	0.297141	6	20.1924	1564.67	2362.93	2872.54	3979.19	79.1277	2769.9
MH	170501|-004011	18	1.09571	0.275916	6	21.7457	1587.7	2384.08	2887.41	3958.43	79.5034	2731.72
MH	170501|-004011	19		0.265304	6	22.6156	1553.22	2341.36	2878.37	3933.42	79.5466	2769.9
MH	170501|-004012	1	1.45669	0.253168	4	15.7998	1517.11	2337.54	2761.54	3934.95	79.1255	2750.81
MH	170501|-004012	2	1.28012	0.207728	4	19.256	1478.77	2197.26	2749.7	3917.06	79.7314	2750.81
MH	170501|-004012	3	1.23598	0.194745	4	20.5397	1523.55	2242.16	2765.97	3941.76	80.2134	2750.81
MH	170501|-004012	4	1.18664	0.197341	4	20.2695	1530.25	2243.32	2783.55	3980.45	80.304	2731.72
MH	170501|-004012	5	1.18924	0.19165	4	20.8714	1534.77	2211.99	2775.39	3966.64	80.8431	2731.72
MH	170501|-004012	6	0.921791	0.189551	4	21.1025	1525.15	2231.53	2786.13	4010.83	80.7036	2731.72
MH	170501|-004012	7	0.997092	0.215517	4	18.56	1523.62	2225.92	2774.8	3971.67	80.1023	2750.81
MH	170501|-004012	8	1.3736	0.194745	4	20.5397	1525.56	2239.46	2799.66	4023.34	80.4959	2750.81
MH	170501|-004012	9	0.947757	0.192148	5	26.0216	1496.53	2213.73	2788.12	3944.55	80.1806	2731.72
MH	170501|-004012	10	0.921791	0.316785	6	18.9403	1534.85	2334.36	2888.9	4119.55	77.5742	2769.9
MH	170501|-004012	11	1.00488	0.267449	4	14.9561	1514.27	2257.22	2752.67	4036.32	74.7951	2731.72
MH	170501|-004012	12	0.690694	0.264853	5	18.8784	1529.29	2333.38	2846.96	3844.09	79.8939	2750.81
MH	170501|-004012	13	1.08018	0.288222	6	20.8173	1507.63	2321.82	2817.35	3762.74	78.8655	2731.72
MH	170501|-004012	14	0.890632	0.296012	6	20.2694	1499.62	2349.98	2832.35	3885.44	79.7518	2750.81
MH	170501|-004012	15	0.867263	0.324574	6	18.4858	1525.67	2381.71	2866.56	3688.03	79.3308	2750.81
MH	170501|-004012	16	1.09317	0.272642	6	22.0069	1524.56	2371.08	2859.25	3697.42	79.9783	2769.9
MH	170501|-004012	17	0.833507	0.277836	6	21.5955	1516.77	2371.08	2859.25	3830.29	80.0239	2769.9
MH	170501|-004012	18	0.950354	0.386893	7	18.0929	1536.32	2401.91	2868.58	3723.42	78.8767	2769.9
MH	170501|-004012	19	0.734836	0.568654	11	19.3439	1564.25	2522.1	3001.35	3773.95	77.9376	2769.9
MH	170501|-004012	20	0.750416	0.58683	11	18.7448	1548.47	2514.32	3012.81	3773.94	77.5573	2750.81
MH	170501|-004012	21	0.84649	0.534898	11	20.5647	1572.48	2495.69	2997.58	3770.43	77.8132	2769.9
MH	170501|-004012	22	1.09836	0.57644	11	19.0826	1571.01	2513.97	3009.71	3754.18	77.7442	2769.9
MH	170501|-004012	23	1.10875	0.514113	11	21.3961	1558.86	2493.02	3002.37	3695.57	78.5827	2731.72
MH	170501|-004012	24	1.33205	0.506336	11	21.7247	1567.31	2497.04	2984.48	3639.18	78.4894	2788.98
MH	170501|-004012	25	1.2983	0.508933	11	21.6138	1589.36	2594.7	2957.96	3968.96	78.3237	2769.9
MH	170501|-004012	26	1.14769	0.288222	5	17.3477	1497.53	2266.67	2776.49	4009.86	79.4102	2750.81
MH	170501|-004012	27		0.267499	5	18.6917	1504.14	2271.06	2801.58	3847.75	79.6602	2750.81
MH	170501|-004013	1	1.39552	0.233259	4	17.1483	1539.39	2080.85	2795.19	3799.27	78.2783	2750.81
MH	170501|-004013	2	0.870432	0.197917	5	25.2631	1613.81	2298.74	2841.41	3975.22	80.0396	2769.9
MH	170501|-004013	3	1.48034	0.23225	5	21.5285	1617.1	2381.74	2825.35	4002.5	79.3533	2769.9
MH	170501|-004013	4	0.763395	0.199937	5	25.0079	1649.84	2381.74	2843.69	4019.83	80.3496	2750.81
MH	170501|-004013	5	1.20366	0.203976	5	24.5127	1655.78	2353.91	2870.92	4041.44	80.1734	2769.9
MH	170501|-004013	6	0.579614	0.2787	5	17.9404	1614.16	2339.18	2879.87	3961.56	79.5677	2769.9
MH	170501|-004013	7	1.03402	0.270621	6	22.1712	1658.54	2426.69	2894.3	4082.24	78.9064	2769.9
MH	170501|-004013	8	0.454402	0.300915	7	23.2624	1640.16	2401.62	2900.5	4030.75	79.5778	2769.9
MH	170501|-004013	9	0.69271	0.375639	7	18.6349	1667.99	2493.5	2966.27	4031.29	77.6426	2750.81
MH	170501|-004013	10	1.07037	0.335247	8	23.863	1662.44	2434.52	2947.34	3993.28	78.5321	2750.81
MH	170501|-004013	11	0.828021	0.527106	10	18.9715	1663.87	2512.64	3028.18	3772.71	78.2691	2769.9
MH	170501|-004013	12	0.78561	0.512969	10	19.4944	1676.22	2557.72	3072.61	3876.17	78.143	2769.9
MH	170501|-004013	13	0.569517	0.349384	7	20.0353	1658.99	2451.83	3015.34	3753.43	78.8741	2769.9
MH	170501|-004013	14	0.714925	0.430167	7	16.2727	1657.38	2524.41	3042.84	3756.55	77.4633	2903.51
MH	170501|-004013	15	0.751277	0.543262	9	16.5666	1662	2524.41	3077.31	3778.56	77.2982	2769.9
MH	170501|-004013	16	0.593751	0.444304	8	18.0057	1657.67	2478.79	3041.06	3749.2	78.1213	2903.51
MH	170501|-004013	17	0.389776	0.397854	8	20.1079	1657.43	2494.1	3041.2	3693.69	77.6685	2750.81
MH	170501|-004013	18	0.642221	0.3716	7	18.8375	1659.8	2477.66	3036.88	3662.67	77.0764	2769.9
MH	170501|-004013	19	0.387756	0.288797	4	13.8506	1681.84	2531.62	3039.11	3569.09	77.9585	3037.11
MH	170501|-004013	20	1.5591	0.476617	9	18.8831	1660.03	2530.29	3078.16	3773.71	76.9588	3132.55
MH	170501|-004013	21	1.42581	0.313103	6	19.163	1642.81	2432.23	2998.48	3703.19	79.6696	2769.9
MH	170501|-004013	22	0.32313	0.298895	6	20.0739	1629.75	2432.23	2998.34	3676.34	79.8634	2769.9
MH	170501|-004013	23	1.06633	0.446323	8	17.9242	1666.81	2519.38	3067.24	3716.02	76.9087	2769.9
MH	170501|-004013	24	0.422089	0.27061	6	22.1721	1654.9	2471.34	3017.41	3762.46	79.9864	2769.9
MH	170501|-004013	25	0.69069	0.450362	9	19.9839	1671.13	2557.63	3074.96	3732.72	77.0729	2750.81
MH	170501|-004013	26	0.523067	0.3716	7	18.8375	1652.34	2474.29	3013.38	3579.95	77.9718	3037.11
MH	170501|-004013	27	0.979488	0.381697	6	15.7193	1651.34	2482.89	3024.99	3646.12	77.437	3037.11
MH	170501|-004013	28	0.569517	0.290817	7	24.0701	1648.28	2470.67	3021.66	3734.67	79.4589	2788.98
MH	170501|-004013	29	0.759356	0.302934	6	19.8063	1651.31	2477.76	3018.45	3747.86	78.0634	2769.9
MH	170501|-004013	30	0.496812	0.351404	7	19.9201	1649.55	2477.76	3037.27	3703.1	78.4364	3037.11
MH	170501|-004013	31	0.73916	0.401893	7	17.4176	1665.25	2486.33	3053.93	3719.79	77.4253	3151.64
MH	170501|-004013	32	0.642221	0.311013	5	16.0765	1651.95	2471.92	3027.63	3596.44	78.4983	2769.9
MH	170501|-004013	33	1.0118	0.260524	5	19.1921	1654.82	2517.11	3046.52	3802.57	78.6301	2769.9
MH	170501|-004013	34	0.569517	0.270621	6	22.1712	1651.56	2507.12	3046.88	3839.64	79.8216	2769.9
MH	170501|-004013	35	0.434206	0.315052	6	19.0445	1657.17	2498.86	3059.66	3809.42	78.2039	3132.55
MH	170501|-004013	36	0.89647	0.355443	6	16.8803	1650.66	2465.46	3054.82	3622.2	77.2714	3132.55
MH	170501|-004013	37	0.539223	0.2787	6	21.5285	1661.84	2501.01	3052.42	3813.59	79.1947	3132.55
MH	170501|-004013	38	0.527106	0.337	6	17.8042	1642.74	2461.25	3048.65	3680.86	77.7077	2769.9
MH	170501|-004013	39	0.87649	0.349384	8	22.8974	1661.83	2515.08	3048.65	3719.97	77.787	3132.55
MH	170501|-004013	40	0.452382	0.234269	6	25.6116	1660.95	2518.4	3043.9	3729.7	80.0158	2769.9
MH	170501|-004013	41	0.514988	0.32515	6	18.453	1649.18	2489.92	3030.36	3686.61	77.4932	2750.81
MH	170501|-004013	42		0.32111	7	21.7994	1658.74	2527.64	3045.23	3687.32	77.8433	2750.81
MH	170501|-004014	1	1.34932	0.263198	5	18.9971	1616.52	2488.77	2878.31	2878.31	79.3796	2769.9
MH	170501|-004014	2	1.02652	0.258243	5	19.3616	1618.31	2306.42	2857.13	3875.48	79.9781	2769.9
MH	170501|-004014	3	0.865116	0.248559	5	20.1159	1630.32	2357.72	2893.08	3826.02	80.1161	2769.9
MH	170501|-004014	4	1.14918	0.219507	5	22.7783	1631.56	2373.73	2904.7	3849.1	80.1887	2769.9
MH	170501|-004014	5	0.929676	0.222735	5	22.4482	1628.36	2377.98	2905.48	3774.07	80.6852	2750.81
MH	170501|-004014	6	1.01361	0.309892	6	19.3616	1651.33	2408.67	2917.11	3760.18	79.1355	2750.81
MH	170501|-004014	7	0.868344	0.348629	7	20.0787	1644.75	2434.29	2938.1	3638.42	78.8226	2750.81
MH	170501|-004014	8	0.723083	0.516487	9	17.4254	1684.02	2584.37	3098.58	3810.03	78.1134	2769.9
MH	170501|-004014	9	0.848975	0.564908	10	17.702	1659.19	2510.36	3047.99	3796.24	77.6112	3037.11
MH	170501|-004014	10	0.616556	0.490663	10	20.3806	1668.78	2529.83	3054.32	3715.96	78.0901	3037.11
MH	170501|-004014	11	0.865116	0.539083	10	18.55	1668.22	2557.49	3089.05	3766.47	77.4525	2769.9
MH	170501|-004014	12	0.606872	0.516487	9	17.4254	1665.2	2512.48	3061.21	3799.61	78.03	2769.9
MH	170501|-004014	13	0.235855	0.41319	7	16.9414	1664.36	2494.86	3016.5	3657.83	77.6594	3037.11
MH	170501|-004014	14	0.745678	0.455154	8	17.5765	1662.31	2513.37	3025.24	3675.55	77.313	3037.11
MH	170501|-004014	15	0.784415	0.361541	8	22.1275	1664.89	2494.89	3005.86	3697.29	78.3824	2769.9
MH	170501|-004014	16	0.697257	0.529399	10	18.8893	1682.85	2567.21	3105.66	3820.36	77.6841	3037.11
MH	170501|-004014	17	0.861888	0.490663	10	20.3806	1679.26	2560.11	3077.46	3801.84	77.9883	3037.11
MH	170501|-004014	18	0.658521	0.345401	7	20.2663	1671.04	2514.88	3009.42	3635.05	78.8024	2750.81
MH	170501|-004014	19	0.668205	0.426102	9	21.1217	1675.06	2519.22	3025.3	3701.6	77.6727	2769.9
MH	170501|-004014	20	1.39129	0.374453	9	24.0351	1679.3	2534.37	3018.4	3720.44	78.2574	2769.9
MH	170501|-004014	21		0.206595	5	24.2019	1644.31	2453.22	2968.41	3870.54	80.7855	2769.9
MH	170501|-002018	1	1.0327	0.195207	5	25.6138	1570.55	2403.56	2928.81	3982.97	78.7469	2579.03
MH	170501|-002018	2	1.34403	0.222107	5	22.5117	1683.33	2516.28	3110.04	4121.61	78.8452	3037.11
MH	170501|-002018	3	1.56234	0.199327	5	25.0844	1532.2	2429.93	3107.21	4036.29	79.7665	3056.2
MH	170501|-002018	4	1.10674	0.201225	5	24.8478	1658.25	2454.54	3073.2	3998.3	79.9162	3056.2
MH	170501|-002018	5	0.994735	0.212615	5	23.5167	1654.82	2503.07	3117.05	4059.34	79.9236	3056.2
MH	170501|-002018	6	0.886529	0.187937	5	26.6047	1644.9	2468.05	3119.05	4041.62	80.4315	3037.11
MH	170501|-002018	7	0.821906	0.224005	6	26.7851	1653.22	2488.14	3113.28	3984.63	79.2982	3056.2
MH	170501|-002018	8	0.864882	0.228307	6	26.2804	1655.81	2491.11	3121.61	3994.63	79.1969	3056.2
MH	170501|-002018	9	1.04216	0.239051	6	25.0992	1643.4	2480.53	3140.73	3971.75	78.9928	3037.11
MH	170501|-002018	10	0.185332	0.284713	7	24.5862	1618.75	2470	3140.57	3816.18	79.2701	3056.2
MH	170501|-002018	11	0.786989	0.300829	7	23.269	1647.66	2495.51	3135.42	3819.35	76.0209	3056.2
MH	170501|-002018	12	0.593599	0.244423	6	24.5476	1664.84	2501.58	3143.6	3976.4	78.7839	3056.2
MH	170501|-002018	13	0.564053	0.265911	6	22.5639	1670.85	2518.21	3157.41	3898.3	77.9686	3056.2
MH	170501|-002018	14	0.83265	0.284713	6	21.0739	1669.45	2506.09	3158.33	3846.44	77.5086	3037.11
MH	170501|-002018	15	0.639261	0.228307	6	26.2804	1600.44	2439.83	3128.76	3877.24	79.1665	3056.2
MH	170501|-002018	16	0.440499	0.287399	7	24.3564	1558.65	2414.01	3120.05	3907.87	77.6765	3056.2
MH	170501|-002018	17	0.596285	0.279341	7	25.059	1651.44	2507.93	3159.53	3769.25	77.2625	3056.2
MH	170501|-002018	18	0.985751	0.263225	6	22.7942	1656.46	2505.63	3155.63	3875.34	77.9177	3037.11
MH	170501|-002018	19	0.765501	0.260539	6	23.0292	1587.2	2446.84	3122.77	3988.21	78.1089	3056.2
MH	170501|-002018	20	0.741327	0.279341	7	25.059	1649.14	2494.84	3160.53	3817.31	78.5581	3037.11
MH	170501|-002018	21	0.598971	0.287399	7	24.3564	1650.29	2493.63	3160.09	3729.46	78.1404	3056.2
MH	170501|-002018	22	0.631203	0.263225	7	26.5932	1642.94	2492.78	3144.34	3745.77	78.1266	3037.11
MH	170501|-002018	23		0.255167	7	27.433	1665.26	2520.62	3171.12	3840.66	78.2965	3056.2
MH	170501|-002019	1	1.30086	0.232481	5	21.5071	1626.46	2482.26	3086.12	3994.58	79.3776	3056.2
MH	170501|-002019	2	1.25938	0.23136	5	21.6113	1650.93	2501.5	3090.18	4047.38	79.8002	3037.11
MH	170501|-002019	3	1.18518	0.229178	5	21.8171	1636.76	2489.34	3082.45	4032.57	79.9043	3037.11
MH	170501|-002019	4	1.00402	0.213899	6	28.0506	1667.45	2504.49	3110.56	4004.27	80.3224	3037.11
MH	170501|-002019	5	0.934171	0.253187	6	23.6979	1667.81	2508.06	3096.03	3983.15	79.3326	3056.2
MH	170501|-002019	6	0.593679	0.270648	6	22.169	1654.74	2516.24	3118.11	3987.39	79.1766	3056.2
MH	170501|-002019	7	0.521652	0.403789	10	24.7654	1684.29	2547.6	3142.22	3903.06	77.3729	3056.2
MH	170501|-002019	8	0.783569	0.33831	8	23.647	1691.42	2539.33	3135.47	3878.41	77.786	3037.11
MH	170501|-002019	9	0.753012	0.301205	7	23.24	1673.83	2507.03	3144.23	3869.89	78.717	3056.2
MH	170501|-002019	10	0.790117	0.307753	7	22.7455	1679.61	2507.66	3145.68	3873.74	78.3109	3056.2
MH	170501|-002019	11	0.744281	0.301205	7	23.24	1670.21	2513.42	3153.31	3876.5	78.4095	3037.11
MH	170501|-002019	12	0.680985	0.357954	8	22.3492	1648.95	2510.28	3141.02	3797.75	77.7551	3037.11
MH	170501|-002019	13	0.750829	0.327397	8	24.4352	1666.48	2520.58	3156.02	3826.4	78.1265	3056.2
MH	170501|-002019	14	0.661341	0.307753	8	25.9949	1661.48	2515.43	3143.73	3816.41	78.4124	3056.2
MH	170501|-002019	15	0.840318	0.399424	11	27.5397	1668.91	2528.23	3161.28	3812.77	77.4201	3056.2
MH	170501|-002019	16	0.803213	0.314301	8	25.4533	1673.96	2514.51	3143	3841.73	78.6757	3037.11
MH	170501|-002019	17		0.309935	7	22.5854	1638.2	2504.37	3158.47	3873.31	78.3526	3056.2
MF	170501_006001	1	0.439225	0.314596	15	47.6802	1500.13	2394.81	3085.2	3598.78	75.0271	2996.57
MF	170501_006001	2	0.705139	0.324276	15	46.2569	1489.79	2494.21	3079.26	3891.37	75.6985	3038.12
MF	170501_006001	3	0.204413	0.32254	16	49.6063	1478.11	2470.92	3056.86	3882.67	75.0147	3038.12
MF	170501_006001	4	0.331918	0.319152	16	50.1329	1482	2474.95	3049.6	3868.88	74.6693	3038.12
MF	170501_006001	5	0.592154	0.319152	16	50.1329	1480.69	2449.63	3068.9	3872	74.8303	2996.57
MF	170501_006001	6	0.375938	0.337837	16	47.3601	1481.44	2403.62	3054.84	3788.34	74.0065	2996.57
MF	170501_006001	7	0.317154	0.327676	16	48.8287	1484.06	2414.31	3058.42	3759.75	73.961	3038.12
MF	170501_006001	8	0.35281	0.323206	16	49.504	1487.71	2431.51	3066.83	3739.99	73.886	2996.57
MF	170501_006001	9	0.316197	0.306212	16	52.2514	1484.08	2422.32	3064.3	3748.95	73.8334	3038.12
MF	170501_006001	10	0.304548	0.309541	16	51.6894	1483.3	2450.39	3069.79	3758.68	73.9584	2996.57
MF	170501_006001	11	0.287185	0.322854	16	49.558	1481.21	2441.83	3063.68	3706.64	73.7294	2996.57
MF	170501_006001	12	0.331112	0.305259	16	52.4145	1480.09	2440.66	3062.85	3712.77	73.8913	2996.57
MF	170501_006001	13	0.520582	0.309038	16	51.7736	1485.66	2444.1	3069.56	3710.9	74.0004	2996.57
MF	170501_006001	14	0.288694	0.318236	16	50.2772	1483.46	2463.97	3069.42	3707.02	74.3771	3121.22
MF	170501_006001	15	0.370463	0.323738	17	52.5116	1488.53	2482.01	3068.8	3686.84	74.1269	2996.57
MF	170501_006001	16	0.2937	0.320401	17	53.0585	1489.39	2474.21	3064.67	3681.4	74.1085	2996.57
MF	170501_006001	17	0.435243	0.317063	17	53.6171	1479.37	2475.99	3066.16	3677.44	74.0314	2996.57
MF	170501_006001	18	0.370051	0.32281	16	49.5648	1499.22	2532.07	3054.02	3641.69	74.5996	2996.57
MF	170501_006001	19	0.509804	0.303127	16	52.7832	1501.47	2613.81	3083.58	3780.49	74.8556	3038.12
MF	170501_006001	20	0.665757	0.314937	15	47.6286	1501.84	2531.07	3077.82	3702.19	74.8252	2996.57
MF	170501_006001	21	0.520647	0.287616	14	48.676	1491.04	2513.17	3064.06	3550.68	75.1271	3038.12
MF	170501_006001	22	0.286013	0.312808	17	54.3464	1536.24	2420.44	3099.83	3539	75.3966	3038.12
MF	170501_006001	23	0.321551	0.30651	15	48.938	1535.55	2423.45	3100.03	3556.02	74.4082	3121.22
MF	170501_006001	24	0.434473	0.339495	15	44.1833	1442.72	2335.96	3069.66	3550.69	74.8729	3038.12
MF	170501_006001	25	0.545617	0.32535	16	49.1778	1504.74	2464.84	3107.99	3560.41	74.4663	3162.77
MF	170501_006001	26	0.28016	0.311204	17	54.6265	1538.5	2401.34	3093.94	3503.16	74.6494	3121.22
MF	170501_006001	27	0.44389	0.272883	19	69.6269	1497.16	2373.16	3050.4	3425.76	75.2119	3121.22
MF	170501_006001	28	0.418421	0.294714	16	54.2899	1535.49	2420.19	3105.26	3549.5	74.5502	3038.12
MF	170501_006001	29	0.506227	0.296533	17	57.3292	1554.26	2439.48	3105.79	3485.03	74.8604	3121.22
MF	170501_006001	30	0.302674	0.300904	17	56.4964	1551.01	2407.07	3106.36	3464.29	74.622	3162.77
MF	170501_006001	31	0.299134	0.292054	18	61.6324	1385.22	2311.35	2840.72	3383.28	73.5538	2622.63
MF	170501_006001	32	0.220633	0.299134	17	56.8307	1552.15	2438.21	3084.54	3482.15	74.9721	3162.77
MF	170501_006001	33	0.32482	0.28958	18	62.159	1530.59	2456.83	3068.47	3434.8	75.2521	3162.77
MF	170501_006001	34	0.24668	0.315627	18	57.0293	1549.55	2451.08	3112.59	3499	74.68	3162.77
MF	170501_006001	35	0.296556	0.306434	21	68.5303	1501.38	2384.45	3036.95	3435.4	74.9954	3162.77
MF	170501_006001	36	0.370695	0.310349	18	57.9992	1548.45	2449.77	3108.43	3554.35	74.7782	3121.22
MF	170501_006001	37	0.320694	0.310349	16	51.5549	1551.05	2430.67	3093.8	3463.86	74.4283	3162.77
MF	170501_006001	38	0.377595	0.325867	18	55.2373	1545.68	2428.17	3105.86	3459.61	74.7441	3121.22
MF	170501_006001	39	0.387446	0.398793	17	42.6286	1554.94	2453.49	3100.82	3472.66	74.9016	3038.12
MF	170501_006001	40	0.213423	0.32506	18	55.3744	1560.19	2464.33	3113.01	3528.33	74.8631	3121.22
MF	170501_006001	41	0.232931	0.27745	18	64.8766	1515.27	2427.78	3037.2	3507.18	74.9438	3204.32
MF	170501_006001	42	0.238865	0.27744	17	61.2745	1512.35	2413.96	3046.53	3476.25	75.0349	3121.22
MF	170501_006001	43	0.327883	0.280407	16	57.0599	1530.46	2401.54	3099.2	3537.47	74.5361	3038.12
MF	170501_006001	44	0.339077	0.313047	17	54.3049	1558.85	2464.02	3104.9	3536.87	74.6975	3162.77
MF	170501_006001	45	0.339077	0.321508	16	49.7655	1546.83	2448.57	3107	3596.79	74.5096	3038.12
MF	170501_006001	46	0.339077	0.319751	16	50.0389	1547.42	2428.8	3101.39	3534.98	74.577	3162.77
MF	170501_006001	47	0.423369	0.316237	17	53.7572	1554.9	2472.76	3099.73	3513.09	74.619	3079.67
MF	170501_006001	48	0.461857	0.322085	16	49.6763	1521.9	2423.69	3098.16	3545.65	74.3579	3121.22
MF	170501_006001	49	0.165909	0.291699	16	54.8511	1537.79	2433.51	3088.67	3542.82	75.198	3121.22
MF	170501_006001	50	0.368497	0.318033	16	50.3092	1539.72	2454.29	3105.34	3503.83	74.682	3162.77
MF	170501_006001	51	0.256878	0.295103	17	57.607	1550.69	2464.48	3090.98	3519.79	74.7117	3162.77
MF	170501_006001	52	0.25382	0.266052	15	56.38	1521.24	2386.57	3091.02	3614.05	74.3059	3204.32
MF	170501_006001	53	0.271595	0.282871	16	56.5629	1535.29	2408.27	3099.38	3631.88	74.8811	3069.67
MF	170501_006001	54	0.277631	0.270086	16	59.2404	1535.91	2403.58	3096.92	3567.22	74.8912	3038.12
MF	170501_006001	55	0.292719	0.271595	16	58.9112	1544.9	2426.95	3094.31	3590.71	75.2606	2996.57
MF	170501_006001	56	0.287776	0.292719	16	54.6599	1539.59	2441.86	3096.16	3606.72	74.7545	3038.12
MF	170501_006001	57	0.309792	0.279914	16	57.1604	1547.18	2427.22	3096.06	3589.57	74.9537	3038.12
MF	170501_006001	58	0.316082	0.297212	17	57.1982	1541.41	2429.42	3098.13	3598.9	74.889	3038.12
MF	170501_006001	59	0.316159	0.287776	17	59.0737	1548.69	2432.09	3099.74	3583.49	74.8197	3038.12
MF	170501_006001	60	0.299693	0.293106	16	54.5878	1545.28	2428.39	3099.02	3589.57	74.6445	3038.12
MF	170501_006001	61	0.307926	0.296399	15	50.6075	1540.69	2423.21	3091.38	3566.71	74.5741	3038.12
MF	170501_006001	62	0.354054	0.279933	15	53.5843	1545.29	2417.78	3090.11	3535.84	74.6512	3162.77
MF	170501_006001	63	0.400587	0.291336	16	54.9194	1542.6	2408.82	3098.3	3601.65	74.9214	3162.77
MF	170501_006001	64	0.592788	0.291336	16	54.9194	1539.16	2423.93	3098.95	3624.58	75.0666	3121.22
MF	170501_006001	65		0.230641	11	47.6932	1510.02	2353.43	3068.58	3533.8	74.6445	3038.12
MF	170501-006002	2	0.364656	0.251692	12	47.6773	1514.75	2376.36	2869.89	3722.7	74.8345	2750.73
MF	170501-006002	3	0.344838	0.285383	12	42.0488	1515.87	2367.7	2901.61	3680.38	74.4429	2664.18
MF	170501-006002	4	0.330965	0.27151	13	47.8804	1507.98	2371.22	2947.67	3740.25	73.8124	2750.73
MF	170501-006002	5	0.336911	0.273492	15	54.8462	1516.8	2388.74	2984.14	3654.72	74.2386	2913.47
MF	170501-006002	6	0.362674	0.279438	15	53.6792	1537.62	2387.57	2997.34	3731.81	74.1296	3038.12
MF	170501-006002	7	0.352765	0.295292	15	50.7972	1528.07	2372.68	3002.59	3695.34	74.2191	3162.77
MF	170501-006002	8	0.820477	0.330965	16	48.3435	1505.46	2387.8	3010.22	3692.03	73.8446	2955.02
MF	170501-006002	9	0.279438	0.297274	16	53.8224	1524.47	2391.24	3015.91	3727.75	75.2275	2913.47
MF	170501-006002	10	0.287365	0.309165	17	54.9868	1542.72	2430.95	3049.33	3651.23	74.2991	2955.02
MF	170501-006002	11	0.525184	0.283401	16	56.4571	1540.87	2420.02	3052.82	3629.59	74.3428	2955.02
MF	170501-006002	12	0.295292	0.330965	18	54.3864	1545.8	2448.66	3078.13	3649.02	74.7192	2955.02
MF	170501-006002	13	0.273492	0.311147	17	54.6366	1535.24	2414.11	3068.26	3623.12	74.2581	3038.12
MF	170501-006002	14	0.392402	0.305201	17	55.701	1542.16	2420.33	3075.03	3628.56	74.2337	3160.77
MF	170501-006002	15	0.422129	0.327002	18	55.0455	1540.3	2433.8	3078.03	3616.12	74.5901	3121.22
MF	170501-006002	16	0.416184	0.338892	17	50.1635	1538.36	2428.9	3072.4	3642.43	74.5079	3038.12
MF	170501-006002	17	0.241783	0.323038	17	52.6254	1539.76	2438.19	3088.28	3597.34	74.6886	3038.12
MF	170501-006002	18	0.257638	0.311147	16	51.4226	1540.1	2419.68	3075.08	3627.41	74.1246	3038.12
MF	170501-006002	19	0.261601	0.309165	17	54.9868	1550.57	2434.86	3075.73	3608.29	74.2967	3038.12
MF	170501-006002	20	0.263583	0.313129	17	54.2907	1534.56	2409.31	3078.13	3616.75	74.3402	3038.12
MF	170501-006002	21	0.275474	0.305201	17	55.701	1535.14	2415.98	3078.26	3615.27	74.5931	3162.77
MF	170501-006002	22	0.261601	0.327002	17	51.9874	1544.15	2426.88	3075.53	3588.45	74.3418	3038.12
MF	170501-006002	23	0.283401	0.309165	16	51.7523	1548.78	2412.97	3070.67	3600.99	74.3309	3162.77
MF	170501-006002	24	0.400329	0.319074	17	53.2792	1543.17	2422.51	3079.82	3610.34	74.401	3121.22
MF	170501-006002	25	0.366638	0.313313	16	51.0672	1535.84	2415.88	3086.49	3604.98	75.0068	3038.12
MF	170501-006002	26	0.289347	0.328983	17	51.6744	1533.74	2411.71	3091.18	3612.19	74.6251	3162.77
MF	170501-006002	27	0.376547	0.315111	17	53.9492	1542.58	2405.3	3087.6	3625.27	74.6537	3038.12
MF	170501-006002	28	0.372584	0.334929	17	50.757	1534.38	2425.06	3091.78	3597.24	74.7994	2996.57
MF	170501-006002	29	0.281419	0.317092	17	53.6122	1535.38	2415.28	3090.58	3612.92	74.9301	3038.12
MF	170501-006002	30	0.259619	0.327002	17	51.9874	1537.12	2417.09	3086.58	3587.03	74.5065	3162.77
MF	170501-006002	31	0.394384	0.307183	16	52.0862	1531.84	2397.71	3084.6	3561.72	74.4781	3121.22
MF	170501-006002	32	0.352765	0.340874	17	49.8718	1504.37	2385.9	3086.59	3571.58	74.7971	3162.77
MF	170501-006002	33	0.233856	0.348802	17	48.7383	1524.1	2382.05	3085.81	3572.18	75.4499	3162.77
MF	170501-006002	34	0.24971	0.309165	19	61.4559	1518.59	2414.6	3071.38	3523.09	74.7062	3038.22
MF	170501-006002	35	0.32502	0.321056	21	65.4091	1519.16	2406.32	3053.05	3501.69	74.9486	3038.22
MF	170501-006002	36	0.247728	0.352765	17	48.1907	1544.07	2422.8	3094.09	3570.75	74.7335	3038.22
MF	170501-006002	37	0.221965	0.297274	18	60.5502	1497.18	2368.06	3045.33	3556.22	74.6629	3121.22
MF	170501-006002	38	0.225928	0.291329	17	58.3533	1509.25	2402.23	3072.05	3528.79	74.9974	2996.57
MF	170501-006002	39	0.223946	0.277456	15	54.0626	1490.04	2362.99	3025.48	3458.52	74.5756	3162.77
MF	170501-006002	40	0.223946	0.317092	17	53.6122	1538.13	2406.02	3574.6	3574.6	74.8665	3162.77
MF	170501-006002	41	0.36862	0.305201	20	65.5306	1490.63	2390.83	3037.97	3486.5	74.6421	3162.77
MF	170501-006002	42	0.229892	0.319074	17	53.2792	1548.69	2434.7	3088.19	3557.79	74.8076	3018.12
MF	170501-006002	43	0.319074	0.313129	16	51.0972	1530.58	2395.72	3084.31	3530.24	74.2856	2996.57
MF	170501-006002	44	0.39042	0.317092	17	53.6122	1540.27	2414.65	3091.17	3570.42	74.6826	2996.57
MF	170501-006002	45	0.315111	0.30322	17	56.0649	1539.95	2410.98	3089.55	3571.5	74.8157	2996.57
MF	170501-006002	46		0.332947	18	54.0627	1544.28	2421.79	3087.12	3566.86	74.658	2996.57
MF	170501-006003	1	0.311315	0.274473	16	58.2935	1489.7	2361.91	3043.67	3667.62	70.7125	3121.22
MF	170501-006003	2	0.300263	0.285526	16	56.0369	1535.82	2406.94	3048.35	3714.6	72.7264	3038.12
MF	170501-006003	3	0.307631	0.267105	13	48.67	1522.9	2399.46	3045.48	3649.64	73.1444	3038.12
MF	170501-006003	4	0.322369	0.281842	15	53.2213	1542.77	2393.85	3060.5	3674.48	73.3167	3038.12
MF	170501-006003	5	0.32421	0.291062	18	61.8425	1523.68	2426.69	3070.83	3665	73.8744	3038.12
MF	170501-006003	6	0.346315	0.292894	19	64.8699	1525.08	2365.83	3060.5	3667.74	73.7852	3038.12
MF	170501-006003	7	0.303947	0.283684	17	59.9258	1536.15	2426.69	3068.63	3729.87	73.9129	2996.57
MF	170501-006003	8	0.329736	0.287368	15	52.1979	1528.32	2412.15	3082.26	3681.07	74.3602	3038.12
MF	170501-006003	9	0.318684	0.28921	15	51.8654	1521.42	2420.57	3062.33	3679.72	74.2616	3162.77
MF	170501-006003	10	0.405263	0.285526	17	59.5392	1527.42	2388.77	3077.42	3706.13	74.4442	3038.12
MF	170501-006003	11	0.28591	0.305098	16	52.4422	1528.4	2397.25	3059.86	3666.67	73.7381	3038.12
MF	170501-006003	12	0.932564	0.291666	17	58.2858	1558.92	2415.15	3097.15	3617.61	74.6512	3038.12
MF	170501-006003	13	0.278234	0.312774	18	57.5495	1531.88	2429.93	3061.64	3653.06	74.6109	3038.12
MF	170501-006003	14	0.280153	0.307017	17	55.3715	1536.19	2420.64	3092.84	3615.71	74.938	3079.67
MF	170501-006003	15	0.330043	0.303179	18	59.3709	1507.16	2400.43	3071.55	3595.09	74.9709	3038.12
MF	170501-006003	16	0.278234	0.303179	16	52.7741	1534.67	2409.52	3084.03	3632.93	75.0338	3162.77
MF	170501-006003	17	0.21875	0.205318	16	77.9279	1465.5	2369.37	3045.46	3622.3	74.8129	3204.32
MF	170501-006003	18	0.362664	0.26864	15	55.8368	1536.46	2397.51	3089.05	3671.1	74.7894	3162.77
MF	170501-006003	19	0.337719	0.280153	17	60.6811	1536.17	2416.82	3088.88	3658.96	74.787	3038.12
MF	170501-006003	20	0.282072	0.303179	17	56.0725	1535.7	2409.95	3088.78	3620.7	74.9176	3038.12
MF	170501-006003	21	0.276315	0.299342	17	56.7912	1537.68	2419.14	3092.14	3655.43	75.0367	3121.22
MF	170501-006003	22	0.458607	0.308936	17	55.0276	1539.67	2425.08	3094.59	3718.03	75.0835	2996.57
MF	170501-006003	23	0.276315	0.299342	15	50.1099	1547.34	2432.57	3078.07	3706.71	75.2165	3038.12
MF	170501-006003	24	0.282072	0.287828	16	55.5888	1535.08	2406.83	3090.64	3695.04	75.2501	3121.22
MF	170501-006003	25	0.322369	0.28591	17	59.4593	1527.45	2406.83	3088.66	3701.85	75.0955	3038.12
MF	170501-006003	26	0.359679	0.285057	16	56.1291	1524.18	2385.86	3096.46	3621.04	75.3564	3038.12
MF	170501-006003	27	0.325353	0.285057	16	56.1291	1537.29	2392.68	3095.63	3672.85	75.3152	3079.67
MF	170501-006003	28	0.367734	0.288042	16	55.5475	1542.79	2416.01	3097.77	3629.92	75.5931	3038.12
MF	170501-006003	29	0.282872	0.296184	16	54.0205	1541.69	2416.9	3099.4	3641.8	75.4606	3038.12
MF	170501-006003	30	0.289528	0.296184	16	54.0205	1542.76	2416.22	3095.27	3664.43	75.1607	3162.77
MF	170501-006003	31	0.355422	0.301176	16	53.1251	1534.92	2401.49	3088.56	3684.4	74.7735	3038.12
MF	170501-006003	32	0.323273	0.303627	17	55.9898	1528.23	2406.77	3099.34	3700.12	75.0573	3079.67
MF	170501-006003	33	0.421505	0.280408	16	57.0597	1514.29	2386.33	3094.78	3635.1	75.1349	3038.12
MF	170501-006003	34	0.473865	0.301841	16	53.008	1532.78	2402.97	3090.32	3673.42	74.8413	3038.12
MF	170501-006003	35		0.303053	16	52.796	1537.01	2405.13	3069.78	3691.35	74.5279	3038.12
MF	170501-006003	36	0.408057	0.269993	15	55.557	1526.34	2387.03	3084.59	3714.19	74.2333	3079.67
MF	170501-006003	37	0.310522	0.300569	17	56.5594	1531.95	2414.3	3084.84	3654.06	74.6229	3038.12
MF	170501-006003	38	0.688721	0.290616	15	51.6145	1544.6	2407.05	3086.96	3692.99	74.3327	3162.77
MF	170501-006003	39	0.454923	0.260759	14	53.6894	1522.09	2389.29	3049.4	3730.41	73.5861	3121.22
MF	170501-006003	40		0.263377	13	49.3589	1522.55	2402.21	3054.84	3706.35	73.3812	3038.12
MF	170501-006003	41	0.449603	0.247415	13	52.5433	1512.38	2375.99	3066.66	3693.57	72.3646	3204.32
MF	170501-006003	42	0.33196	0.300622	16	53.223	1531.18	2426.39	3081.61	3729.07	73.517	3079.67
MF	170501-006003	43	0.437828	0.261979	14	53.4394	1533.2	2405.66	3082.06	3704.28	73.5755	3038.12
MF	170501-006003	44	0.349903	0.254801	13	51.0202	1528.1	2387.18	3082.25	3638.62	72.7666	3038.12
MF	170501-006003	45	0.365759	0.290689	15	51.6015	1542.73	2402.92	3075.02	3726.91	73.6025	3038.12
MF	170501-006003	46	0.43783	0.28468	17	59.7162	1518.68	2384.04	3096.64	3680.89	72.4579	3121.22
MF	170501-006003	47	0.362156	0.286481	16	55.8501	1501.46	2400.57	3077	3745.1	71.4239	3121.22
MF	170501-006003	48	0.620908	0.282878	15	53.0264	1531.34	2406.69	3090.04	3719.01	72.8589	3038.12
MF	170501-006003	49	0.316907	0.291095	16	54.9649	1515.59	2386.17	3075.98	3669.78	71.3967	3038.12
MF	170501-006003	50		0.26385	14	53.0605	1533.66	2380.8	3089.26	3673.9	72.796	3038.12
MF	180421-001	1	0.476571	0.325114	14	43.0618	1435.42	2266.03	2915.81	3697.43	74.0079	2865.33
MF	180421-001	2	0.631453	0.352607	14	39.7043	1441.73	2274.28	2923.68	3727.94	74.0952	2884.42
MF	180421-001	3	0.589443	0.361224	15	41.5255	1443.53	2291.75	2929.32	3727.72	74.5753	2903.51
MF	180421-001	4	0.556372	0.352482	15	42.5554	1445.93	2300.11	2933.49	3733.07	74.5434	2941.68
MF	180421-001	5	0.476309	0.346036	15	43.3481	1446.16	2288.42	2938.13	3733.24	74.4291	2922.59
MF	180421-001	6	0.557729	0.350107	15	42.844	1442.36	2284.99	2934.25	3737.39	74.0109	2941.68
MF	180421-001	7	0.531946	0.352821	15	42.5145	1446.71	2309.97	2947.29	3757.64	74.5494	2941.68
MF	180421-001	8	0.451883	0.369105	16	43.3481	1451.68	2295	2935.93	3731.6	74.2318	2941.68
MF	180421-001	9	0.563157	0.352821	15	42.5145	1449.27	2295.44	2937.11	3733.4	73.974	2941.68
MF	180421-001	10	0.576727	0.356892	15	42.0295	1443.55	2300.41	2932.2	3746.35	74.65	1903.51
MF	180421-001	11	0.473595	0.374533	16	42.7199	1453.21	2296.99	2933.92	3731.85	74.5664	2922.59
MF	180421-001	12	0.57656	0.352821	15	42.5145	1450.25	2294.18	2933.18	3715.6	74.3902	2903.51
MF	180421-001	13	0.491236	0.374533	16	42.7199	1452.73	2313.12	2936.38	3693.21	73.9823	2941.68
MF	180421-001	14	0.564514	0.377247	16	42.4125	1449.38	2302.07	2937.78	3702.1	74.2921	2941.68
MF	180421-001	15	0.487165	0.374533	16	42.7199	1452.13	2303.19	2932.89	3710.74	74.597	2922.59
MF	180421-001	16	0.618794	0.381318	16	41.9597	1456.06	2311.37	2940.2	3723.81	74.2585	2903.51
MF	180421-001	17	0.359606	0.377247	16	42.4125	1454.81	2321.16	2937.96	3756.41	74.5926	2922.59
MF	180421-001	18	0.34872	0.367748	16	43.5081	1447.77	2308.52	2907.67	3698.06	73.8535	2903.51
MF	180421-001	19	0.519733	0.373176	17	45.5549	1457.89	2365.81	2951.77	3749.57	74.0416	2922.59
MF	180421-001	20	0.377247	0.365034	16	43.8315	1444.75	2343.38	2926	2926	74.5777	2941.68
MF	180421-001	21	0.320579	0.377246	15	39.7619	1462.81	2328.53	2951.38	3752.06	74.2913	2941.68
MF	180421-001	22	0.50752	0.360963	16	44.3259	1475.25	2385.73	2947.34	3819.91	74.6742	2922.59
MF	180421-001	23	0.26733	0.363677	16	43.9951	1457.36	2333.17	2931.76	3776.02	74.386	2903.51
MF	180421-001	24	0.582115	0.322967	14	43.3481	1457.09	2346.12	2944.94	3837.49	74.9506	2884.42
MF	180421-001	25	0.26733	0.341965	15	43.8641	1447.84	2301.64	2937.38	3767.51	74.7015	2865.33
MF	180421-001	26	0.301255	0.343322	15	43.6908	1446.43	2293.58	2930.88	3741.9	74.5901	2903.51
MF	180421-001	27	0.275472	0.358249	16	44.6617	1450.67	2296.71	2930.92	3724.43	74.5838	2903.51
MF	180421-001	28	0.371819	0.350107	15	42.844	1445.49	2327.13	2933.38	3773.36	74.5912	2922.59
MF	180421-001	29	0.12213	0.356892	16	44.8315	1455.94	2295.6	2936.29	3718.68	74.7063	2846.25
MF	180421-001	30	0.211693	0.354178	16	45.175	1475.92	2382.15	2955.48	3790.27	75.0153	2884.52
MF	180421-001	31	0.415244	0.389461	17	43.6501	1473.14	2286.01	2943.43	3695.04	73.8716	2884.42
MF	180421-001	32	0.246975	0.365034	16	43.8315	1474.11	2276.71	2930.43	3677.55	74.054	2922.59
MF	180421-001	33		0.400317	17	42.4663	1497.38	2281.83	2930.16	3662.22	74.5462	2922.59
MF	180421-002	1	0.562189	0.313351	14	44.6783	1398.5	2304.95	2687.08	3525.82	74.7238	2655.38
MF	180421-002	2	0.354166	0.335734	15	44.6782	1402.2	2316.08	2695.96	3526.24	74.7967	2674.46
MF	180421-002	3	0.360749	0.338367	15	44.3306	1412.72	2289.14	2691.72	3525.99	74.415	2655.38
MF	180421-002	4	0.483194	0.334417	15	44.8542	1408.92	2289.07	2691.96	3528.86	74.4637	2655.38
MF	180421-002	5	0.292286	0.335734	15	44.6782	1398.84	2287.14	2692.69	3529.81	74.9183	2636.29
MF	180421-002	6	0.302818	0.308085	14	45.442	1395.17	2284.57	2692.43	3530.53	74.4139	2674.46
MF	180421-002	7	0.60827	0.309401	14	45.2487	1400.09	2272.53	2683.41	3531.72	74.4932	2674.46
MF	180421-002	8	0.60827	0.363968	15	41.2124	1400.51	2277.48	2706.75	3537.94	75.3875	2693.55
MF	180421-002	9	0.629336	0.354116	16	45.1829	1405.4	2272.66	2698.26	3533.14	75.2774	2693.55
MF	180421-002	10	0.229089	0.363382	16	44.0308	1406.42	2259.18	2698	3536.34	75.3693	2674.46
MF	180421-002	11	0.352849	0.327843	14	42.7034	1401.8	2278.77	2705.87	3536.56	74.4872	2636.29
MF	180421-002	12	0.280463	0.377865	17	44.9896	1413.81	2291.8	2707.26	3553.82	74.7588	2636.29
MF	180421-002	13	0.289652	0.331784	15	45.2101	1406.12	2262.35	2701.38	3546.48	74.8385	2693.55
MF	180421-002	14	0.664567	0.362066	16	44.1908	1407.61	2280.09	2694.7	3559.92	74.6821	2655.38
MF	180421-002	15	0.487143	0.367332	16	43.5573	1416.03	2308.6	2734.3	3597.4	75.5484	2617.2
MF	180421-002	16	0.566139	0.381815	17	44.5242	1411.89	2290.2	2735.53	3566.18	75.4994	2712.64
MF	180421-002	17	0.566139	0.379181	17	44.8335	1408.15	2277.24	2733.7	3553.33	75.2954	2712.64
MF	180421-002	18	0.518741	0.383131	17	44.3712	1407.85	2277.52	2722.89	3552.94	75.416	2712.64
MF	180421-002	19	0.599054	0.379181	17	44.8335	1410.81	2291.61	2724.35	3552.65	75.3078	2712.64
MF	180421-002	20	0.471344	0.393664	17	43.184	1417.98	2277.59	2712.94	3561.34	75.3002	2712.64
MF	180421-002	21	0.423946	0.384448	17	44.2192	1410.68	2279.26	2738.66	3563.42	75.1635	2712.64
MF	180421-002	22	0.512158	0.373915	17	45.4649	1412.32	2283.95	2738.66	3554.7	75.1041	2712.64
MF	180421-002	23	0.530591	0.380498	17	44.6783	1410.43	2274.43	2730.59	3553.01	75.149	2674.46
MF	180421-002	24	0.622753	0.381815	17	44.5242	1410.76	2278.48	2724.13	3559.53	75.1288	2712.64
MF	180421-002	25	0.521374	0.377865	17	44.9896	1417.91	2275.99	2732.4	3563.01	75.3444	2750.81
MF	180421-002	26	0.501625	0.367332	16	43.5573	1413.49	2282.96	2728.31	3546.61	75.124	2674.64
MF	180421-002	27	0.55034	0.351533	16	45.5149	1416.67	2280.37	2722.9	3562.54	75.2181	2712.64
MF	180421-002	28	0.584571	0.355483	16	45.0092	1412.61	2268.02	2722.35	3555.71	75.1882	2693.55
MF	180421-002	29	0.61617	0.368649	16	43.4017	1413.81	2279.53	2721.87	3551.07	75.1546	2693.55
MF	180421-002	30	0.683316	0.360749	15	41.5802	1409.29	2269.43	2723.06	3553.92	75.3919	2712.64
MF	180421-002	31	0.576672	0.369332	16	43.3215	1406.76	2262.18	2713.49	3548.42	75.3821	2693.55
MF	180421-002	32	0.659618	0.363382	16	44.0308	1405.65	2271.65	2721.57	3551.5	75.3097	2712.64
MF	180421-002	33	0.716231	0.384448	16	41.6181	1418.81	2278.78	2739.38	3549.58	75.2962	2674.46
MF	180421-002	34	0.639869	0.379181	17	44.8335	1412.52	2277.83	2718.52	3547.65	75.5298	2693.55
MF	180421-002	35	0.555606	0.388398	16	41.1949	1414.75	2297.81	2755.18	3566.25	75.3482	2674.46
MF	180421-002	36	0.389714	0.377865	17	44.9896	1413.62	2279.46	2716.04	3553.19	75.2794	2693.55
MF	180421-002	37		0.381815	17	44.5242	1423.07	2298.45	2722.32	3579.5	75.267	2693.55
MF	180421-005	1	0.746019	0.325876	13	39.8925	1444.62	2324.66	2989.28	3781.3	74.5687	3133.46
MF	180421-005	2	0.560733	0.326688	14	42.8543	1471.22	2360.23	2994.05	3759.47	73.8997	3133.46
MF	180421-005	3	0.83375	0.344566	15	43.533	1476.44	2367.95	2996.5	3765.56	72.8065	3056.2
MF	180421-005	4	0.533103	0.357569	15	41.9499	1474.77	2363.25	3004.02	3764.27	73.7972	3094.38
MF	180421-005	5	0.997942	0.352693	15	42.5299	1491.44	2368.27	3018.77	3769.19	72.614	3094.38
MF	180421-005	6	0.573735	0.344566	15	43.533	1489.48	2393.68	3046.87	3712.42	72.8614	3075.29
MF	180421-005	7	0.64753	0.368946	16	43.3668	1494.93	2397.75	3036.37	3711.73	72.7326	3113.46
MF	180421-005	8	0.835411	0.328313	14	42.6422	1493.13	2396.29	3034.04	3750.75	73.2886	3094.38
MF	180421-005	9	0.85979	0.28443	13	45.7054	1486.43	2361.66	3044.52	3803.99	74.2157	3075.29
MF	180421-005	10	0.433959	0.33644	14	41.6122	1485.81	2366.92	3021.51	3770.24	73.4703	3094.38
MF	180421-005	11	0.446961	0.33969	15	44.1579	1492.73	2377.66	3022.55	3717.22	72.095	3113.46
MF	180421-005	12	0.409579	0.315311	15	47.5721	1487.94	2375.49	3040.8	3729.67	72.7054	3113.46
MF	180421-005	13	0.677755	0.331564	15	45.2401	1493.71	2384.97	3031.8	3734.45	72.1419	3075.29
MF	180421-005	14	0.28768	0.300683	13	43.2349	1477.25	2329.81	3006.27	3776.72	73.7428	3018.03
MF	180421-005	15	0.674505	0.359194	17	47.3282	1486.03	2365.91	3007.61	3763.07	71.5985	3075.29
MF	180421-005	16	0.741143	0.329938	14	42.4322	1487.11	2372.55	3021.37	3787.55	73.2956	3075.29
MF	180421-005	17	0.668004	0.367321	16	43.5586	1491.56	2392.42	3012.21	3789.84	73.1491	3075.29
MF	180421-005	18	0.31206	0.375569	15	39.9394	1490.73	2371.84	3018.33	3749.69	73.2216	3056.2
MF	180421-005	19	0.417705	0.352269	16	45.4198	1493.84	2380.41	3017.72	3724.77	71.6542	3056.2
MF	180421-005	20	0.429083	0.354318	16	45.1572	1500.41	2395.27	3017.88	3710.2	72.189	3037.11
MF	180421-005	21	0.516849	0.323437	14	43.2851	1499.06	2394.31	3025.38	3741.69	72.6238	3056.2
MF	180421-005	22	0.711887	0.342941	15	43.7393	1498.32	2403.29	3023.78	3730.48	72.686	3056.2
MF	180421-005	23	0.515224	0.342941	15	43.7393	1497.09	2401.14	3028.51	3735.62	73.4589	3056.2
MF	180421-005	24	0.435584	0.362445	16	44.1446	1491.61	2390.61	3029.85	3715.67	72.8256	3056.2
MF	180421-005	25	0.485969	0.368946	16	43.3668	1493.67	2400.04	3024.38	3695.04	72.358	3075.29
MF	180421-005	26	0.711887	0.342941	15	43.7393	1499.32	2406.36	3028.75	3715.28	72.732	3037.11
MF	180421-007	1	0.438406	0.346395	15	43.3032	1469.39	2312.65	2846.09	3388.22	76.7109	2827.16
MF	180421-007	2	0.456447	0.375261	17	45.3018	1475.37	2320.04	2849.25	3356.65	76.708	2865.33
MF	180421-007	3	0.469076	0.362632	16	44.1219	1470.68	2307.24	2848.4	3372.43	76.8033	2903.51
MF	180421-007	4	0.515984	0.384282	17	44.2383	1472.02	2315.59	2854.52	3357.29	76.9391	2865.33
MF	180421-007	5	0.416756	0.404127	18	44.5405	1476.98	2309.48	2849.3	3333.94	77.0932	2846.25
MF	180421-007	6	0.546654	0.355416	16	45.0177	1470.52	2303.68	2859.21	3318.37	77.0583	2865.33
MF	180421-007	7	0.539438	0.373457	17	45.5206	1496.2	2312.29	2852.95	3314.62	77.4344	2846.25
MF	180421-007	8	0.414952	0.360828	16	44.3425	1476.86	2311.91	2855.31	3323.71	77.4396	2865.33
MF	180421-007	9	0.432994	0.384282	18	46.8406	1477.59	2327.92	2860.96	3301.92	77.0512	2884.42
MF	180421-007	10	0.438406	0.380674	17	44.6576	1489.06	2321.11	2868.36	3319.59	77.0359	2788.98
MF	180421-007	11	0.405932	0.355416	16	45.0177	1472.63	2302.35	2864.2	3332.86	77.2686	2884.42
MF	180421-007	12	0.61882	0.368045	16	43.4729	1469.92	2303.18	2865.92	3312.69	77.0003	2846.25
MF	180421-007	13	0.330158	0.389694	18	46.1901	1472.7	2308.88	2870.4	3342.94	77.6363	2941.68
MF	180421-007	14	0.44021	0.35722	16	44.7903	1472.68	2307.61	2860.99	3283	76.9723	2922.59
MF	180421-007	15	0.384282	0.364436	17	46.6474	1479.5	2305.59	2861.61	3316.57	77.2799	2884.42
MF	180421-007	16	0.375261	0.369849	16	43.2609	1477.17	2303.24	2862.36	3291.18	76.9207	2827.16
MF	180421-007	17	0.530417	0.35722	17	47.5897	1475.05	2292.72	2853.51	3290.63	77.1909	2846.25
MF	180421-007	18	0.442014	0.371653	17	45.7416	1473.68	2290.71	2859.62	3316.54	77.5408	2884.42
MF	180421-007	19	0.422169	0.342787	14	40.8417	1469.79	2287.32	2854.74	3305.19	77.2793	2788.98
MF	180421-007	20	0.322941	0.36624	16	43.6872	1470.64	2302.64	2857.13	3302.49	77.123	2808.07
MF	180421-007	21	0.398715	0.351807	16	45.4795	1473.15	2293.13	2848.36	3293.98	76.9219	2827.16
MF	180421-007	22	0.411344	0.369849	17	45.9647	1474.61	2290.2	2853.99	3296.79	77.1287	2884.42
MF	180421-007	23	0.474489	0.386086	18	46.6217	1479.65	2306.57	2852.14	3296.51	77.1518	2903.5
MF	180421-007	24	0.434798	0.368045	16	43.4729	1469.22	2306.76	2860.84	3295.98	77.2771	2884.42
MF	180421-007	25	0.496139	0.405932	17	41.8789	1478.59	2319.32	2853.32	3305.13	76.9257	2846.25
MF	180421-007	26	0.438406	0.396911	19	47.8697	1469.89	2299.72	2848.66	3315.04	77.303	2808.07
MF	180421-007	27	0.416756	0.386086	16	41.4415	1469.53	2300.6	2862.66	3321.04	76.863	2750.81
MF	180421-007	28	0.555675	0.386086	17	44.0316	1468.53	2291.07	2859.92	3301.19	76.949	2846.25
MF	180421-007	29	0.382478	0.344591	16	46.4319	1469.93	2281.96	2862.8	3342.78	77.4924	2827.76
MF	180421-007	30	0.617016	0.359024	16	44.5653	1478.93	2318.75	2855.86	3254.94	76.9505	2846.25
MF	180421-007	31	0.523201	0.375261	18	47.9666	1474.23	2289.64	2845.47	3306.31	77.5229	2846.25
MF	180421-007	32	0.496139	0.322941	14	43.3516	1466.72	2285.01	2858.43	3316.55	77.2596	2846.25
MF	180421-007	33	0.548459	0.364436	16	43.9035	1477.35	2309.99	2850.31	3296.91	77.1469	2884.42
MF	180421-007	34	0.434798	0.35722	16	44.7903	1488.6	2306.06	2846.16	3319.75	77.2953	2846.25
MF	180421-007	35	0.487118	0.321137	14	43.5951	1462.02	2286.97	2854.7	3324.31	77.0721	2808.07
MF	180421-007	36	0.389694	0.331962	15	45.1859	1471.87	2312.28	2856.46	3351.37	76.9913	2846.25
MF	180421-007	37	0.519592	0.380674	16	42.0307	1467.86	2297.63	2850.3	3293.76	76.805	2865.33
MF	180421-007	38	0.420365	0.364436	16	43.9035	1468.72	2298.67	2859.43	3308.67	77.254	2884.42
MF	180421-007	39	0.505159	0.38789	18	46.4049	1477.54	2298.67	2855.4	3304.4	77.0158	2827.67
MF	180421-007	40	0.33557	0.382478	17	44.447	1468.68	2296.18	2860.04	3318.86	76.9924	2865.33
MF	180421-007	41	0.405932	0.364436	16	43.9035	1465.92	2292.35	2851	3303.09	76.7445	2808.07
MF	180421-007	42	0.496136	0.380674	17	44.6576	1465.31	2288.72	2849.86	3310.29	76.8547	2846.25
MF	180421-007	43	0.351807	0.402323	18	44.7402	1471.9	2296.91	2857.38	3304.68	76.9538	2903.51
MF	180421-007	44		0.391498	19	48.5315	1469.63	2298.7	2852.7	3297.83	76.9142	2903.51
MF	180421-009	1	0.597558	0.321587	10	31.0958	1524.49	2379.17	2947.93	3849.25	74.1009	2941.68
MF	180421-009	2	0.474397	0.321587	10	31.0958	1518.37	2392.06	2987.55	3836.74	74.8695	3037.11
MF	180421-009	3	0.592997	0.358079	11	30.7195	1538.56	2392.87	3000.08	3835.24	74.3654	3018.03
MF	180421-009	4	1.25898	0.36264	12	33.0907	1531.91	2377.54	3016.98	3816.37	74.7153	2998.94
MF	180421-009	5	0.6637	0.346675	12	34.6146	1515.49	2357.49	2997.16	3842.14	76.9309	3018.03
MF	180421-009	6	0.410536	0.360359	11	30.5251	1532.76	2383.91	3012.32	3822.73	75.2475	3018.03
MF	180421-009	7	0.415098	0.364921	11	30.1435	1531.14	2402.28	3034.04	3877.01	74.6927	3018.03
MF	180421-009	8	1.44372	0.364921	11	30.1435	1527.2	2400.07	3043.4	3864.15	74.8112	3037.11
MF	180421-009	9	0.449309	0.358079	11	30.7195	1521.9	2381.06	3022.87	3892.62	77.4707	3037.11
MF	180421-009	10	0.394571	0.364921	11	30.1435	1529.56	2409.8	3032.32	3878.28	75.0054	3037.11
MF	180421-009	11	0.342113	0.396852	12	30.238	1525.89	2412.25	3033.46	3839.84	74.8602	3056.2
MF	180421-009	12	0.394571	0.394571	12	30.4128	1518.82	2407.89	3045.07	3814.15	74.7431	3037.11
MF	180421-009	13	0.919145	0.401413	12	29.8944	1534.14	2407.89	3041.26	3811.59	74.8074	3018.03
MF	180421-009	14	0.415098	0.360359	11	30.5251	1524.77	2407.36	3016.24	3852.64	76.3991	3056.2
MF	180421-009	15	0.862126	0.367202	11	29.9563	1527.13	2408.66	3053.18	3827.08	75.113	3075.29
MF	180421-009	16	0.385448	0.403694	12	29.7255	1528.71	2423.2	3044.39	3869.35	76.0961	2998.94
MF	180421-009	17	0.396852	0.401413	12	29.8944	1524.43	2444.7	3041.75	3792.55	75.0081	3075.29
MF	180421-009	18	0.396852	0.396852	12	30.238	1535.96	2422.99	3047.3	3772.68	74.9082	3094.38
MF	180421-009	19	0.417378	0.412817	12	29.0686	1534.06	2412.08	3063.07	3793.06	74.7185	3132.55
MF	180421-009	20		0.437905	13	29.6868	1536.23	2438.63	3051.62	3799.41	74.8005	3037.11
MF	180421_013	1		0.203099	8	39.3897	1379.58	2413.11	2833.08	3751.14	78.0366	2750.81
MF	180421_013	2	0.62363	0.257935	9	34.8925	1364.69	2429.15	2854.99	3761.52	77.1646	2617.3
MF	180421_013	3	0.707333	0.272718	11	40.3347	1375.38	2413.06	2850.72	3760.02	76.8512	3037.11
MF	180421_013	4	0.519355	0.257968	11	42.6409	1362.37	2421.35	2921.42	3748.04	76.0575	3037.11
MF	180421_013	5	0.614529	0.321556	14	43.5383	1407.62	2315.09	2981.31	3790.03	76.2208	3037.11
MF	180421_013	6	0.483208	0.329561	17	51.5838	1418.96	2294.93	3023.55	3807.32	75.7581	3037.11
MF	180421_013	7	0.572832	0.363187	16	44.0544	1435.57	2296.24	3050.03	3850.68	75.9174	3056.2
MF	180421_013	8	0.484682	0.368472	16	43.4226	1443.93	2299.65	3061.78	3857.76	75.9384	3056.2
MF	180421_013	9	0.530133	0.351723	15	42.6472	1453.2	2314.28	3079.71	3904.08	76.3565	3037.11
MF	180421_013	10	0.45547	0.381538	17	44.5565	1454.58	2310.31	3087.08	3894.41	76.0424	3056.2
MF	180421_013	11	0.426345	0.37234	16	42.9715	1462.67	2311.97	3085.98	3868.75	76.2218	3075.29
MF	180421_013	12	0.409635	0.382543	17	44.4394	1464.66	2319.25	3093.41	3843.78	76.2315	3094.38
MF	180421_013	13	0.699508	0.397247	18	45.3119	1470.84	2324.27	3093.45	3829.39	77.0882	3075.29
MF	180421_013	14	0.55143	0.386001	16	41.4507	1471.95	2327.88	3100.89	3827.72	76.6941	3094.38
MF	180421_013	15	0.580051	0.347271	15	43.1939	1469.74	2313.71	3090.07	3854.14	77.0052	3056.2
MF	180421_013	16	0.794111	0.362319	16	44.16	1474.79	2317.86	3099.59	3825.26	77.645	3094.38
MF	180421_013	17	0.793542	0.35436	16	45.1518	1471.6	2320.03	3102.7	3830.12	77.6456	3056.2
MF	180421_013	18	0.382319	0.380481	17	44.6803	1473.18	2322.79	3107.99	3807.3	76.3854	3113.46
MF	180421_013	19	0.64366	0.382413	17	44.4546	1470.01	2308.04	3091.93	3843.55	77.1833	3075.29
MF	180421_013	20	0.514133	0.346598	16	46.163	1474.35	2299.79	3098.6	3852.18	77.0158	3075.29
MF	180421_013	21	0.538114	0.342943	15	43.739	1470.67	2317.86	3090.04	3843.05	76.9842	3075.29
MF	180421_013	22		0.347574	15	43.1563	1470.15	2306.14	3101.4	3821.21	77.6217	3075.29
MF	180421_013	23	0.30789	0.374942	16	42.6733	1469.3	2313.3	3091.74	3795.66	76.2736	3056.2
MF	180421_013	24	0.334943	0.358925	15	41.7915	1470.26	2310.14	3099.41	3821.09	76.4532	3094.38
MF	180421_013	25	0.552789	0.325259	14	43.0426	1477.26	2295.71	3111.19	3797.32	77.1169	3094.38
MF	180421_013	26	0.402277	0.349762	15	42.8863	1465.27	2316.31	3082.95	3827.67	76.3527	3151.64
MF	180421_013	27	0.822502	0.346803	15	43.2522	1467.66	2308.01	3104.88	3855.76	77.45	3094.38
MF	180421_013	28		0.328197	14	42.6573	1463.15	2301.15	3091.56	3862.14	77.2482	3113.46
MF	180421_013	29		0.329598	14	42.476	1458.72	2292.53	3110.89	3855.46	77.5247	3094.38
MF	180421_013	30	0.495144	0.300928	13	43.1997	1470	2295.83	3121.66	3892.67	76.7324	3094.38
MF	180421_013	31	0.730323	0.381575	17	44.5522	1455.95	2302.48	3070.48	3819.28	77.1809	3094.38
MF	180421_013	32	0.758125	0.327081	14	42.8029	1463.18	2296.23	3100.63	3912.53	77.5171	3113.46
MF	180421_013	33	0.660246	0.34747	16	46.0471	1457.53	2293.86	3083.57	3880.01	77.0284	3075.29
MF	180421_013	34	0.795223	0.322314	16	49.641	1459.01	2309.47	3080.39	3893.26	77.5087	3075.29
MF	180421_019	1		0.325091	13	39.9888	1420.99	2342.9	3026.38	3881.43	75.9885	2979.85
MF	180421_019	2	0.37859	0.32391	13	40.1346	1458.19	2370.54	2972.62	3720.27	76.8346	2922.59
MF	180421_019	3	0.496859	0.325008	14	43.0759	1456.84	2358.49	2957.83	3714.05	76.9262	2827.16
MF	180421_019	4	0.474878	0.321838	13	40.393	1438.51	2349.41	2948.6	3727.84	76.9533	2846.25
MF	180421_019	5	0.377077	0.313226	14	44.6962	1438.88	2349.59	2942.23	3735.26	76.8539	2808.07
MF	180421_019	6	0.424139	0.320056	14	43.7423	1448.43	2320.27	2955.65	3637.4	76.7706	2865.33
MF	180421_019	7	0.407814	0.30382	13	42.7885	1442.87	2301.68	2957.93	3498.48	76.8481	2922.59
MF	180421_019	8	0.343573	0.327154	15	45.85	1446.51	2321.02	2961.85	3513.7	76.3638	2884.42
MF	180421_019	9	0.447757	0.354332	16	45.1554	1444.88	2309.83	2963.49	3532.25	76.4129	2884.42
MF	180421_019	10	0.425382	0.362109	15	41.424	1445.92	2326.06	2952.23	3524.5	76.5757	2865.33
MF	180421_019	11	0.375394	0.368975	16	43.3634	1455.23	2324.41	2954.59	3533.16	76.4428	2865.33
MF	180421_019	12	0.386116	0.367191	15	40.8507	1451.92	2315.81	2947.16	3492.92	76.4153	2922.59
MF	180421_019	13	0.355346	0.35331	15	42.4556	1448.45	2310.74	2951.96	3506.97	76.2621	2922.59
MF	180421_019	14	0.343604	0.354815	16	45.0939	1446.56	2318.68	2949.52	3505.28	76.1794	2903.51
MF	180421_019	15	0.356131	0.338239	15	44.3473	1446.75	2307.89	2948.74	3523.98	76.3053	2884.42
MF	180421_019	16	0.351311	0.348891	15	42.9934	1448.39	2308.21	2945.77	3519.8	76.2475	2884.42
MF	180421_019	17	0.436051	0.37496	16	42.6712	1447.44	2311	2949.73	3489.28	76.5005	2865.22
MF	180421_019	18	0.395179	0.359599	16	44.494	1437.95	2324.95	2958.01	3565.19	75.8095	2941.68
MF	180421_019	19	0.341489	0.350421	16	45.6594	1431	2348.47	2978.8	3717.2	75.6274	2884.42
MF	180421_019	20	0.326773	0.349639	16	45.7615	1425.01	2339.22	2961.66	3762.7	75.476	2960.77
MF	180421_019	21	0.350778	0.3435	16	46.5793	1419.93	2357.28	2980.34	3737.09	75.8849	2941.68
MF	180421_019	22	0.452227	0.316371	14	44.2518	1433.15	2360.66	2968.23	3789.98	75.8556	2827.16
MF	180421_019	23	0.37372	0.347997	15	43.1038	1422.53	2375.29	2975.65	3722.29	75.62	2992.59
MF	180421_019	24	0.482504	0.325928	15	46.0224	1419.38	2331.53	2966.01	3758.77	75.8341	2992.59
MF	180421_019	25	0.465068	0.344148	15	43.5859	1421.97	2376.21	2956.11	3753.99	75.7688	2903.51
MF	180421_019	26	0.454133	0.352041	16	45.4493	1423.12	2343.76	2947.88	3708.71	75.5626	2992.59
MF	180421_019	27	0.344586	0.337758	16	47.3712	1435.18	2334.6	2951.81	3702.13	75.7728	2846.25
MF	180421_019	28	0.354679	0.321091	15	46.7158	1435.52	2313.85	2965.52	3652.13	86.9531	2960.77
MF	180421_019	29	0.52434	0.310109	11	35.4714	1447.4	2297.69	2970.51	3573.03	75.5765	2941.68
MF	180421_019	30	0.502933	0.343747	15	43.6367	1451.87	2327.23	2973.81	3600.18	75.6292	2846.85
MF	180421_019	31	0.400716	0.352982	15	42.4951	1455.8	2309.73	2948.99	3534.51	75.3478	2960.77
MF	180421_019	32	0.387289	0.34983	15	42.878	1449.27	2318.77	2953.07	3551.14	75.3041	2998.94
MF	180421_019	33	0.630103	0.348849	16	45.8651	1449.51	2318.08	2960.18	3499.78	75.6971	2922.45
MF	180421_019	34	0.474822	0.34442	16	46.4549	1448	2304.97	2970	3491.26	75.228	2960.77
MF	180421_019	35	0.470082	0.328324	15	45.6866	1439.37	2286.69	2951.68	3486.1	75.4086	2903.51
MF	180421_019	36	0.381566	0.341827	16	46.8073	1444.29	2316.69	2959.88	3487.97	75.0176	2998.94
MF	180421_019	37	0.484653	0.344621	15	43.5261	1444.14	2308.93	2950.1	3483.71	75.315	2827.16
MF	180421_019	38	0.508923	0.339509	16	47.1269	1438.63	2300.56	2948.53	3471.32	75.3963	2941.68
MF	180421_019	39	0.489735	0.341064	15	43.98	1431.18	2277.46	2945.73	3481.22	75.282	2922.59
MF	180421_019	40	0.583695	0.34035	14	41.1341	1446.53	2310.88	2945.26	3515.16	75.2482	2960.77
MF	180421_019	41	0.565172	0.30454	14	45.971	1446.46	2313.79	2953.51	3480.81	75.4762	2922.59
MF	180421_021	1		0.308504	14	45.3803	1352.69	2271.48	2819.51	3537.03	75.2555	2617.2
MF	180421_021	2	0.488952	0.281001	14	49.8219	1361.62	2237.48	2775.18	3548.81	75.8925	2674.46
MF	180421_021	3	0.480097	0.293929	14	47.6306	1358.98	2233.77	2776.72	3602.05	76.0881	2674.46
MF	180421_021	4	0.452853	0.333633	18	53.9515	1368.08	2241.75	2792.13	3573.01	75.8136	2636.29
MF	180421_021	5	0.471709	0.2991	15	50.1505	1361.6	2255.19	2774.75	3595.02	76.0513	2655.38
MF	180421_021	6	0.565379	0.280133	14	49.9763	1364.86	2254.29	2786.19	3524.52	76.0852	2674.46
MF	180421_021	7	0.438741	0.298328	15	50.2802	1365.98	2271.32	2770.4	3614.88	76.0011	2636.29
MF	180421_021	8	0.597364	0.28439	14	49.2282	1355.24	2253.96	2791.66	3590.66	75.5686	2636.29
MF	180421_021	9	0.415006	0.308979	15	48.547	1348.7	2252.66	2767.05	3508.62	75.9681	2636.29
MF	180421_021	10	0.469678	0.300841	15	49.8602	1349.28	2248.06	2757.24	3565.16	76.4405	2655.38
MF	180421_021	11	0.503294	0.313596	14	44.6434	1357.19	2266.7	2767.95	3572.13	80.5183	2579.03
MF	180421_021	12	0.486945	0.257252	13	50.5341	1351.84	2252.63	2747.56	3541.78	76.0662	2617.2
MF	180421_021	13	0.531517	0.308012	17	55.1927	1346.68	2255.2	2777.29	3551.07	75.6737	2598.12
MF	180421_021	14	0.470257	0.301934	15	49.6797	1341.73	2270.63	2777.98	3542.01	75.8247	2674.46
MF	180421_021	15	0.616771	0.279144	13	46.5709	1335.33	2276.52	2788.05	3519.45	75.579	2636.29
MF	180421_021	16	0.514196	0.278858	13	46.6187	1361.07	2279.49	2780.95	3539.64	75.5548	2674.46
MF	180421_021	17	0.535598	0.301663	15	49.7244	1347.32	2256.6	2778.2	3529.57	75.2101	2655.38
MF	180421_021	18	0.471391	0.260207	13	49.9602	1339.13	2263.77	2768.66	3576.26	75.4107	2674.46
MF	180421_024	1		0.295032	14	47.4525	1464.31	2282.57	3080.99	3861.29	77.4886	3151.64
MF	180421_024	2	0.525521	0.32512	14	43.061	1476.8	2292.83	3074.99	3804.11	75.943	3189.81
MF	180421_024	3	0.444661	0.306315	14	45.7046	1486.38	2307.19	3086.81	3801.51	75.6262	3170.72
MF	180421_024	4	0.532426	0.305109	14	45.8852	1489.84	2311.27	3112.01	3776.67	76.2494	3170.72
MF	180421_024	5	0.488906	0.329785	15	45.4842	1494.12	2318.13	3103.27	3712.84	75.8504	3132.55
MF	180421_024	6	0.516714	0.325926	15	46.0227	1498.06	2311.91	3112.96	3703.17	76.1816	3151.64
MF	180421_024	7	0.469287	0.329133	15	45.5743	1498.11	2312.62	3116.82	3696.42	76.1035	3170.72
MF	180421_024	8	0.307556	0.320962	15	46.7345	1492.93	2318.54	3118.49	3702.71	75.5836	3132.55
MF	180421_024	9	0.363398	0.345028	16	46.373	1496.69	2317.01	3130.56	3687.38	75.5067	3151.64
MF	180421_024	10	0.5139	0.344329	16	46.4672	1496.77	2306.42	3131.58	3692.73	76.2663	3151.64
MF	180421_024	11	0.497903	0.328286	15	45.6919	1492.31	2304.37	3106.86	3706.98	76.2218	3189.81
MF	180421_024	12	0.372407	0.341091	16	46.9083	1498.65	2320.25	3126.87	3669.95	75.8347	3170.72
MF	180421_024	13	0.347562	0.32548	15	46.0858	1501.32	2308.1	3120.25	3654.99	75.9252	3151.64
MF	180421_024	14	0.501214	0.324201	15	46.2676	1500.79	2307.4	3115	3674.3	76.3893	3189.34
MF	180421_024	15	0.702817	0.305966	11	35.9517	1449.61	2265.38	2983.09	3838.45	76.8458	3121.55
MF	180421_024	16	0.792434	0.368785	12	32.5393	1460.45	2276.19	3056.57	3848.31	77.0701	3113.46
MF	180421_024	17	0.710891	0.269311	12	44.5582	1480.02	2290.07	3065.57	3847.65	76.8054	3151.64
MF	180421_024	18	0.626031	0.290553	13	44.7423	1477.38	2288.02	3067.29	3811.29	76.1588	3170.72
MF	180421_024	19	0.639538	0.287978	13	45.1423	1488.21	2288.78	3085.43	3797.68	76.3602	3113.46
MF	180421_024	20	0.92838	0.233897	11	47.0292	1354.36	2092.1	2684.89	3346.81	76.6457	3113.46
MF	180421_024	21	0.603309	0.268886	13	48.3476	1376.42	2096.12	2724.92	3325.43	76.7487	3113.46
MF	180421_024	22	0.64874	0.286587	13	45.3614	1376.35	2085.69	2740.19	3333.61	76.9049	3113.46
MF	180421_024	23	0.795477	0.338206	15	44.3517	1385.56	2131.24	2788.55	3304.64	76.5867	2865.33
MF	180421_024	24	0.603671	0.338255	16	47.3016	1386.28	2124.27	2798.68	3285.4	76.7247	2865.33
MF	180421_024	25	0.583604	0.305515	14	45.8243	1394.74	2145.89	2809.41	3295.7	76.5674	2903.51
MF	180421_028	1		0.230166	8	34.7575	1495.21	2282.94	2812.3	3875.81	75.7654	2808.07
MF	180421_028	2	0.487349	0.298936	10	33.452	1500.25	2300.09	2836.13	3888.07	75.9777	2808.07
MF	180421_028	3	0.385248	0.278101	9	32.3623	1510.08	2308.12	2864.07	4005.94	76.2882	2778.89
MF	180421_028	4	0.451525	0.319123	10	31.3359	1515.61	2331.29	2878.19	4001.5	76.6518	2808.07
MF	180421_028	5	0.437771	0.30858	10	32.4065	1508.29	2349.91	2886.21	3943.17	76.8917	2846.25
MF	180421_028	6	0.625818	0.3336	10	29.976	1508.66	2301.34	2890.2	3882.5	77.4303	2884.42
MF	180421_028	7	0.620553	0.340527	11	32.3029	1506.9	2309.06	2895.9	3834.64	77.5206	2884.42
MF	180421_028	8	0.713896	0.334296	11	32.905	1500.89	2313.05	2908.55	3717.46	77.7942	2922.95
MF	180421_028	9	1.03374	0.331663	11	33.1662	1508.23	2299.19	2920.25	3661.25	78.5154	2903.51
MF	180421_028	10	0.711657	0.335438	11	32.7929	1509.9	2336.65	2929.76	3638.63	77.8225	2903.51
MF	180421_028	11	0.779703	0.339026	11	32.4459	1507.88	2288.32	2926.34	3596.73	77.9839	2922.59
MF	180421_028	12	0.595758	0.298591	10	33.4906	1505.06	2290.77	2942.02	3615.35	77.8871	2922.59
MF	180421_028	13	0.99143	0.327276	11	33.6108	1510.95	2279	2920.75	3722.9	77.8121	2922.59
MF	180421_028	14	0.597309	0.341679	11	32.194	1507.59	2286.27	2928.82	3643.58	77.1513	2922.59
MF	180421_028	15	0.466787	0.340357	11	32.319	1514.88	2270.21	2937.32	3560.3	77.2726	2941.68
MF	180421_028	16	0.365838	0.369665	12	32.4618	1501.03	2284.48	2929.51	3603.86	76.8209	2960.77
MF	180421_028	17	0.357401	0.395173	13	32.897	1507.25	2290.06	2927.14	3700.28	77.0785	2922.59
MF	180421_028	18	0.351449	0.367572	12	32.6467	1506.22	2278.24	2943.4	3577.03	77.2319	2922.59
MF	180421_028	19	0.550683	0.368887	12	32.5303	1492.99	2245.23	2934.19	3655.31	77.4047	2960.77
MF	180421_028	20	0.846103	0.340278	11	32.3265	1503.72	2246.06	2963.44	3652.39	78.2077	3018.03
MF	180421_028	21	0.594436	0.371785	12	32.2767	1498.11	2258.67	2957.97	3560.25	77.6427	2960.77
MF	180421_028	22	0.541924	0.369724	12	32.4566	1501.84	2263.54	2962.04	3643.88	77.6118	2998.94
MF	180421_028	23	0.583227	0.381286	12	31.4724	1507.67	2299.36	2956.1	3608.59	77.6163	2941.68
MF	180421_028	24	0.601912	0.33725	11	32.6168	1514.37	2271.63	2964.31	3618.68	77.9169	2979.85
MF	180421_028	25	0.693679	0.368496	12	32.5648	1506.88	2259.66	2971.07	3711.51	77.9521	2979.85
MF	180421_028	26	0.626253	0.341355	11	32.2245	1503.52	2253.1	2960.77	3584.2	77.905	2960.77
MF	180421_028	27	0.489792	0.337483	11	32.5942	1499.38	2265.53	2952.54	3561.66	77.6736	2960.77
MF	180421_028	28	0.561341	0.367635	12	32.6411	1502.67	2271.29	2971.65	3585.66	77.6485	2960.77
MF	180421_028	29	0.510765	0.362903	12	33.0667	1507.86	2301.13	2972.07	3614.29	77.6528	2941.68
MF	180421_028	30	0.631136	0.372252	12	32.2362	1495.96	2242.52	2956.86	3622.33	77.8926	2960.77
MF	180421_028	31	0.553318	0.354137	12	33.8852	1497.94	2282.52	2955.15	3525.17	77.6832	2979.85
MF	180421_028	32	0.372454	0.369774	12	32.4523	1497.08	2281.12	2945.21	3418.44	77.236	2979.85
MF	180421_028	33	0.491672	0.389088	13	33.4115	1501.66	2291.45	2939.07	3617.3	77.4089	2941.68
MF	180421_028	34	0.678723	0.388574	13	33.4557	1495.68	2267.05	2964.98	3609.77	77.8673	2960.77
MF	180421_028	35	0.468817	0.334468	11	32.888	1506.02	2279.55	2970.03	3584.94	77.6308	2979.85
MF	180421_028	36	0.562865	0.388372	14	36.0479	1498.25	2280.48	2977.05	3625.33	77.6645	2979.85
MF	180421_028	37	0.550426	0.36211	12	33.1391	1498.08	2291.25	2977.05	3478.53	77.7641	2979.85
