# Supplementary material for: Acoustic divergence in advertisement calls among three sympatric Microhyla species from East China
Source: PeerJ. 2020 Mar 11;8:e8708. doi: 10.7717/peerj.8708 (PMC7071819; doi:10.7717/peerj.8708)
Supplement: Supplemental Information 5 [file peerj-08-8708-s005.xls]

## Sheet: individual calls
Raw data of individual calls in the three Microhyla species
SPECIES	SVL	Number of calls	CI	CD	PULSE	PR	F0	F1	F2	F3	CTI	DF	CVCI	CVCD	CVPULSE	CVPR	CVF0	CVF1	CVF2	CVF3	CVCTI	CVDF
MB	21.19	35	0.276972	0.238853	4.57143	19.1019	1576.28	2074	2672.95	3818.46	74.2984	2324.66	48.5008	23.1649	27.2009	13.1947	5.51327	5.84866	5.15471	1.6886	1.1638	2.18845
MB	21.21	29	0.265412	0.255381	5.55172	21.7835	1750.69	2278.03	2740.38	3936.53	73.7512	2330.35	15.1202	8.71221	17.0787	15.8823	5.80459	5.00644	2.59311	2.72288	1.38401	7.88046
MB	21.55	22	0.217358	0.270101	5.31818	19.7324	1678.2	2272.08	2688.65	3918.51	74.718	2405.44	48.9252	13.4297	17.7783	14.5669	5.06089	4.05645	3.3373	2.79314	1.23529	4.29548
MB	22.52	28	0.26023	0.252002	4.57143	18.0536	1610.01	2164.7	2618.63	3787.75	75.3139	2217.52	37.9712	9.11128	19.2262	13.6266	4.18872	3.58814	3.65873	6.1599	0.583026	5.78362
MB	22.82	25	0.377798	0.261201	5.4	20.7595	1662.7	2326.71	2728.1	3812.34	76.1373	2330.15	28.2885	12.6849	15.1203	12.2385	1.93944	1.45872	2.55267	8.46329	1.10321	0.350622
MB	23.16	19	0.286315	0.267917	5	18.7283	1596.72	1848.88	2576.42	3901.33	73.8372	1750.08	49.0377	10.236	20	18.4304	3.91632	1.15499	1.78669	1.81786	0.989444	0.791392
MB	23.17	19	0.38697	0.281988	5.10526	18.0456	1691.74	2103.47	2587.69	3846.53	74.8654	2071.55	50.3511	14.2177	19.4727	11.4434	2.53761	2.23829	2.58855	7.42133	1.17378	1.98808
MB	23.3	15	0.188859	0.228876	4.8	21.3834	1557.32	2168.85	2631.11	3802.46	74.881	2178.56	36.6319	20.6358	21.1289	13.3644	4.09795	1.32118	2.4026	0.809837	1.38764	3.5998
MB	22.21	17	0.279166	0.227951	5	22.3033	1696.66	2127.21	2827.45	3766.81	73.2465	2065.13	52.1162	14.412	17.3205	23.2129	2.12474	1.75279	2.51273	1.9727	0.855741	4.00694
MB	23.46	27	0.236317	0.30906	4.85185	15.9968	1631.07	1967.29	2544.24	3808.37	74.2243	1873.5	43.3578	13.8932	12.3977	19.0345	3.7223	1.79961	4.93039	2.2214	1.49999	2.91825
MB	22.41	37	0.236916	0.275873	4.59459	16.6916	1621.92	2084.2	2576.04	3819.2	75.4704	2122.91	59.7378	16.8615	20.8125	15.0128	4.1963	5.27383	6.15884	2.74146	1.57922	6.49934
MB	22.73	37	0.163795	0.289985	4.43243	15.156	1607.48	1999.19	2686.89	3744.12	72.8668	1828.69	56.7065	21.2843	29.8646	19.9275	5.3735	3.21013	4.73191	5.3271	2.01615	3.29191
MB	22.19	26	0.194531	0.330523	5.34615	16.1572	1591.82	2283.37	2674.57	3723.68	75.5505	2411.67	22.5211	8.06014	14.91	11.9371	0.81016	0.857989	0.900833	1.16479	2.13896	5.20009
MB	23.33	33	0.196631	0.277719	4.81818	17.5077	1671.72	1944.45	2623.82	3743.37	74.4043	1791.63	43.9412	16.1471	21.0475	21.1312	4.20521	1.79721	1.42883	2.54071	1.08194	1.53395
MB	22.55	21	0.126203	0.261287	5.42857	20.7321	1632.58	2189.06	2652.96	3753.94	75.9694	2341.66	38.5021	15.7668	18.9401	11.4097	4.57174	4.37797	2.06852	2.52906	1.93313	7.97359
MB	22.7	26	0.185757	0.296811	5.34615	18.1806	1641.93	2057.8	2582.22	3744.08	73.6351	2074.49	34.3957	12.5192	9.07502	10.6169	2.22902	2.81988	1.16876	1.96017	1.07139	7.76794
MB	22.78	28	0.159318	0.308633	5.28571	17.3469	1710.81	2186.99	2654.05	3772.97	74.419	2248.68	43.3814	19.0801	19.1675	18.138	2.88135	3.25003	2.10459	1.7136	1.51064	4.38447
MH	20.9225	27	1.05452	0.377254	7.59259	21.2532	1592.88	2403.61	3028.58	3766.25	79.0851	2999.65	22.1394	41.4959	28.1201	17.3274	3.18174	4.82504	2.8277	2.87894	1.20946	8.98915
MH	21.465	25	1.0676	0.269403	5.64	21.0499	1579.56	2408.94	2966.72	3744.47	79.7853	3033.33	22.3094	11.1649	8.68613	7.76078	1.34083	1.41269	0.629308	2.23711	0.670627	0.443633
MH	21.1	28	0.85641	0.356019	7.14286	21.1372	1586	2407.38	2930.66	3759.9	79.0722	2942.36	20.2269	34.692	20.7703	17.0849	1.69167	2.41499	1.90842	2.79255	1.46963	3.20946
MH	21.3	26	0.89279	0.349949	6.96154	21.2399	1570.68	2397.62	2911.62	3721.92	79.293	2906.44	17.7817	32.377	20.5091	26.4211	1.7168	3.60409	2.02596	1.98823	1.16463	3.07278
MH	21.09	34	0.845819	0.312356	5.91176	19.3606	1556.25	2330.32	2919.24	3815.17	78.6766	2812	33.7082	27.0994	19.6948	12.895	3.40533	4.33226	2.25603	3.48897	0.868818	3.78762
MH	21.7	24	0.942103	0.263969	5.29167	20.1519	1593.49	2357.1	2877.91	3843.19	79.2897	2765.13	21.8495	17.6955	16.2269	6.99053	2.98457	2.93759	1.47922	1.79713	0.560839	0.508905
MH	21.58	24	1.02576	0.260001	5.25	20.3242	1532.71	2275.3	2842.42	3809	79.2796	2696.73	20.9973	16.8425	14.0421	5.8612	2.32769	2.36436	0.885139	2.03528	0.532559	6.37399
MH	20.84	44	0.912712	0.272961	5.45455	20.1615	1585.36	2350.53	2874.4	3803.61	79.1779	2764.69	23.3831	18.6496	16.5187	10.1627	3.40197	3.01498	1.51441	2.14595	0.712157	0.583599
MH	22.7	28	0.857348	0.297349	5.89286	19.9661	1550.51	2316.93	2942.51	3714.79	78.5923	2956.67	28.6477	16.1826	14.1145	10.2976	3.38149	3.57333	2.74869	2.51775	1.37611	4.13666
MH	23.58	19	1.00123	0.257574	5.57895	22.079	1550.9	2311.84	2865.01	3880.38	79.2207	2760.86	32.1823	17.8436	13.7756	18.1939	1.81753	1.91836	1.11067	2.16345	0.674951	0.423013
MH	22.49	27	1.04763	0.329029	6.51852	19.8338	1530.28	2349.41	2856.34	3870.83	79.1225	2752.93	19.8235	41.9267	43.4678	10.7828	1.74253	5.00933	3.22417	3.34539	1.66977	0.587536
MH	22.55	42	0.761616	0.338296	6.61905	19.9263	1650.94	2462.67	3001.63	3786.52	78.4527	2850.79	41.5195	25.8357	22.1217	14.1931	1.37443	3.38009	2.5749	3.63545	1.3092	5.05982
MH	20.55	21	0.845274	0.385757	7.57143	20.0079	1656.66	2480.68	2995.11	3717.64	78.6737	2842.61	31.0845	30.9734	26.6031	10.7625	1.28411	3.0884	2.60437	5.53674	1.41003	4.44178
MH	21.15	23	0.818975	0.247579	6.08696	24.6672	1636.08	2480.12	3125.61	3917.34	78.6054	3029.64	36.8065	13.8489	13.0238	6.58612	2.40766	1.35514	1.55887	2.75133	1.27798	3.25556
MH	19.61	17	0.850412	0.299987	7.17647	23.8146	1662.44	2512.37	3129.87	3907.02	78.6619	3048.34	27.0267	18.8962	23.2309	8.32757	1.05946	0.634983	0.858864	2.12247	1.11243	0.317693
MF	23.13	65	0.357867	0.305333	16.3385	53.7279	1517.86	2437.21	3080	3597.91	74.6445	3069.29	30.5734	7.55115	7.89739	9.64166	2.19949	1.83254	1.17699	3.30197	0.186676	2.81121
MF	22.33	45	0.325425	0.310074	16.6222	53.4565	1530.29	2407.29	3067.34	3606.49	74.5655	3035.95	31.3725	7.05814	9.79247	7.99356	1.03238	0.881771	2.99762	1.74885	0.442826	3.75658
MF	23.84	50	0.366086	0.285814	15.88	55.656	1528.87	2402.93	3078.96	3675.21	74.1122	3069.7	33.0273	6.61912	8.50019	8.25905	0.982584	0.696631	0.523119	0.971632	1.54754	1.71997
MF	23	33	0.441194	0.361266	15.5455	43.0377	1454.08	2309.12	2935.42	3711.2	74.3994	2882.46	30.7156	4.56644	5.1086	2.94594	0.869007	1.25214	0.328274	3.92745	0.411105	6.16164
MF	25.77	37	0.508639	0.361814	15.973	44.1672	1409.57	2281.81	2715.69	3549.91	75.1019	2685.82	25.5455	6.45763	6.34461	2.67903	0.449281	0.541659	0.653928	0.438519	0.450939	1.0654
MF	23.03	26	0.594763	0.341523	14.8846	43.6029	1488.02	2378.57	3020.89	3746.38	72.9512	3076.83	30.2818	6.30952	6.93701	4.13723	0.787822	0.878613	0.490973	0.785312	1.01305	0.948223
MF	24.11	44	0.453049	0.369357	16.5455	44.7794	1473.56	2302.55	2855.93	3315.02	77.0971	2854.51	15.711	5.34697	7.07421	3.7811	0.434734	0.471432	0.212892	0.735609	0.301191	1.33199
MF	21.58	20	0.591076	0.374842	11.45	30.5966	1528.08	2403.1	3026.6	3834.34	75.1832	3037.11	53.1255	7.97318	6.63017	4.04672	0.419277	0.87987	0.906835	0.842445	1.14514	1.30559
MF	22.82	34	0.572783	0.341256	14.9118	43.5575	1450.52	2321.52	3060.27	3834.83	76.8368	3053.96	25.2342	12.3767	15.1641	6.22351	2.29922	1.61505	2.54015	1.11608	0.792783	3.23715
MF	21.81	41	0.42813	0.339551	14.9024	43.8793	1441.07	2325.46	2959.21	3599.58	76.2188	2912.36	17.3227	5.14832	7.62217	5.48805	0.760284	1.00612	0.495738	3.21083	2.36882	1.82844
MF	24.58	18	0.500573	0.293861	14.5	49.3195	1353.74	2257.86	2777.64	3557.31	76.0557	2644.77	10.8467	6.49596	9.23756	5.30577	0.702113	0.579263	0.554192	0.854182	1.52424	1.08523
MF	22.38	25	0.563181	0.313589	14.08	44.9945	1460.66	2256.1	3013.68	3647.2	76.3435	3116.82	27.0443	9.45126	10.6376	7.67071	3.35452	3.73222	5.03182	5.49285	0.649979	3.00321
MF	23.17	37	0.580077	0.345828	11.3243	32.7516	1504.18	2285.14	2933.2	3668.84	77.4669	2930.07	27.3032	9.73228	10.2081	2.92927	0.386574	1.06689	1.33735	3.77393	0.749147	1.95728
